# Supplementary material
Source: PubMed Central journal article supplement (PMC3253933)

## **Supporting Information**

### **Base-Mediated Stereospecific Synthesis of Aryloxy and Amino Substituted Ethyl Acrylates**

**M. Shahjahan Kabir<sup>\*,†</sup>, Ojas A. Namjoshi<sup>†</sup>, Ranjit Verma<sup>†</sup>, Michael Lorenz<sup>†</sup>, V. V. N. Phani Babu Tiruveedhula<sup>†</sup>, Aaron Monte<sup>‡</sup>, Steven H. Bertz<sup>††</sup>, Alan W. Schwabacher<sup>\*,†</sup>, James M. Cook<sup>\*,†</sup>**

<sup>†</sup>*Department of Chemistry and Biochemistry, University of Wisconsin-Milwaukee, Milwaukee, WI 53201*

<sup>‡</sup>*Department of Chemistry, University of Wisconsin-La Crosse, La Crosse, WI 54601*

<sup>††</sup>*Complexity Study Center and University of North Carolina–Charlotte, Charlotte, NC 28223*

*Email: [capncook@uwm.edu](mailto:capncook@uwm.edu); Phone: 414-229-5856; Fax: 414-229-5530*

**<sup>1</sup>H and <sup>13</sup>C NMR spectral data for all products.**

Products from Table 1 & 4: S2-S15

Products from Table 3: S16-S27

**(E)-Ethyl 3-(3,5-dimethoxyphenoxy)acrylate (2)****Proton Spectrum**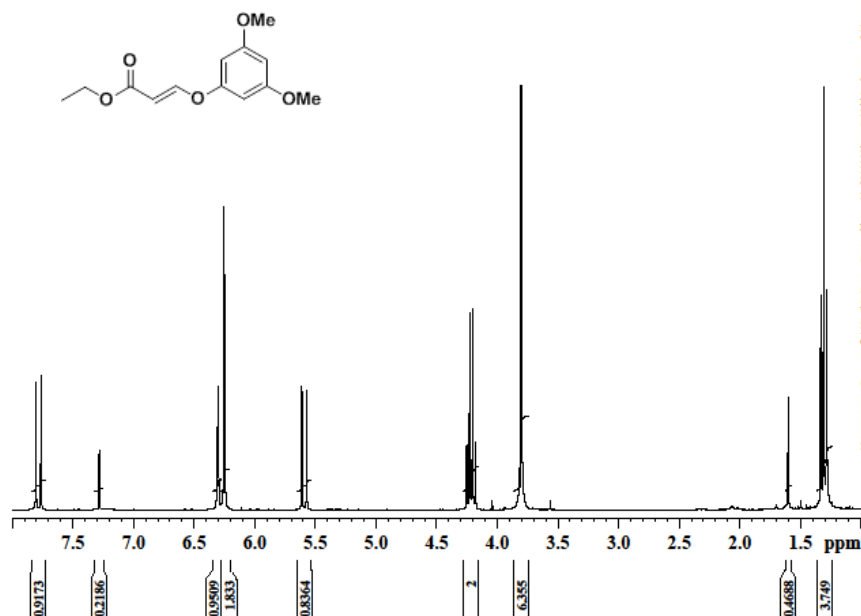

```

Current Data Parameters
NAME          SK-06-43
EXPNO        1
PROCNO       1

F2 - Acquisition Parameters
Date_        20090705
Time         11.07
INSTRUM     dpz300
PROBHD      5 mm Multis
PULPROG     zg
TD           32768
SOLVENT     CDCl3
NS           16
DS           0
SWH          5995.204 Hz
FIDRES       0.182959 Hz
AQ           2.7329011 sec
RG           387.4
DW           83.400 usec
DE           6.00 usec
TE           300.0 K
D1           1.00000000 sec

----- CHANNEL f1 -----
NUC1         1H
P1           5.00 usec
PL1          -6.00 dB
SFO1         300.1319508 MHz

F2 - Processing parameters
SI           32768
SF           300.1300000 MHz
WDW          EM
SSB           0
LB           0.30 Hz
GB           0
PC           1.00

1D NMR plot parameters
CX           22.00 cm
F1P          2.545 ppm
F1           763.81 Hz
F2P          0.669 ppm
F2           198.14 Hz
PPMCM        0.08567 ppm/cm
HZCM         25.71215 Hz/cm

```

**Carbon Spectrum**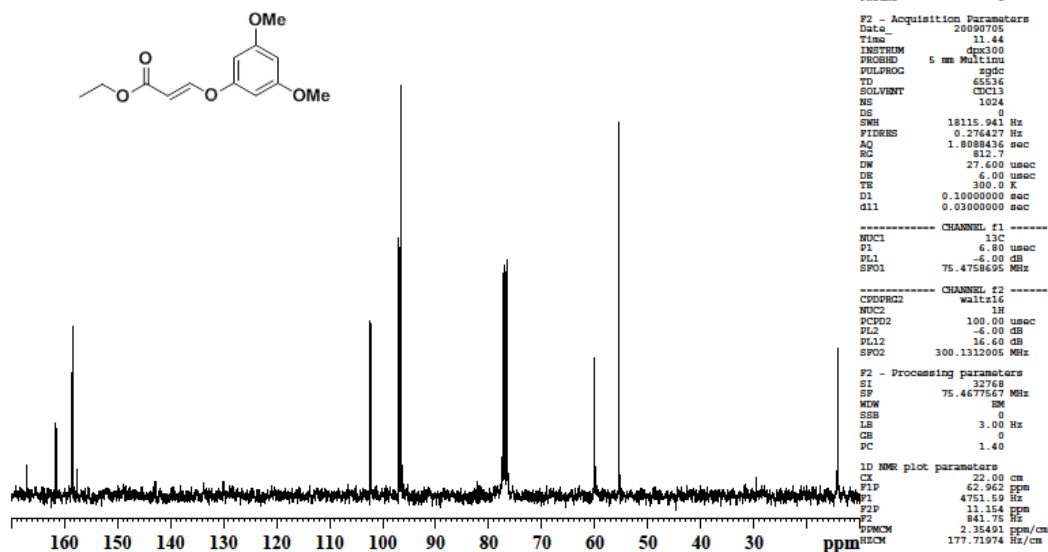

```

Current Data Parameters
NAME          SK-06-43
EXPNO        2
PROCNO       1

F2 - Acquisition Parameters
Date_        20090705
Time         11.44
INSTRUM     dpz300
PROBHD      5 mm Multis
PULPROG     zgdc
TD           65536
SOLVENT     CDCl3
NS           1024
DS           0
SWH          18115.941 Hz
FIDRES       0.276427 Hz
AQ           1.8088436 sec
RG           812.7
DW           27.600 usec
DE           6.00 usec
TE           300.0 K
D1           0.10000000 sec
d11          0.03000000 sec

----- CHANNEL f1 -----
NUC1         13C
P1           6.80 usec
PL1          -6.00 dB
SFO1         75.4758695 MHz

----- CHANNEL f2 -----
CDPRG2      waltz16
NUC2         1H
PCPD2       100.00 usec
PL2         -6.00 dB
PL12        16.60 dB
SFO2        300.1312005 MHz

F2 - Processing parameters
SI           32768
SF           75.4677567 MHz
WDW          EM
SSB           0
LB           3.00 Hz
GB           0
PC           1.40

1D NMR plot parameters
CX           22.00 cm
F1P          62.962 ppm
F1           4751.159 Hz
F2P          11.154 ppm
F2           841.75 Hz
PPMCM        2.35491 ppm/cm
HZCM         177.71974 Hz/cm

```

**(E)-Ethyl 3-(4-*tert*-butylphenoxy) acrylate (3)****Proton Spectrum**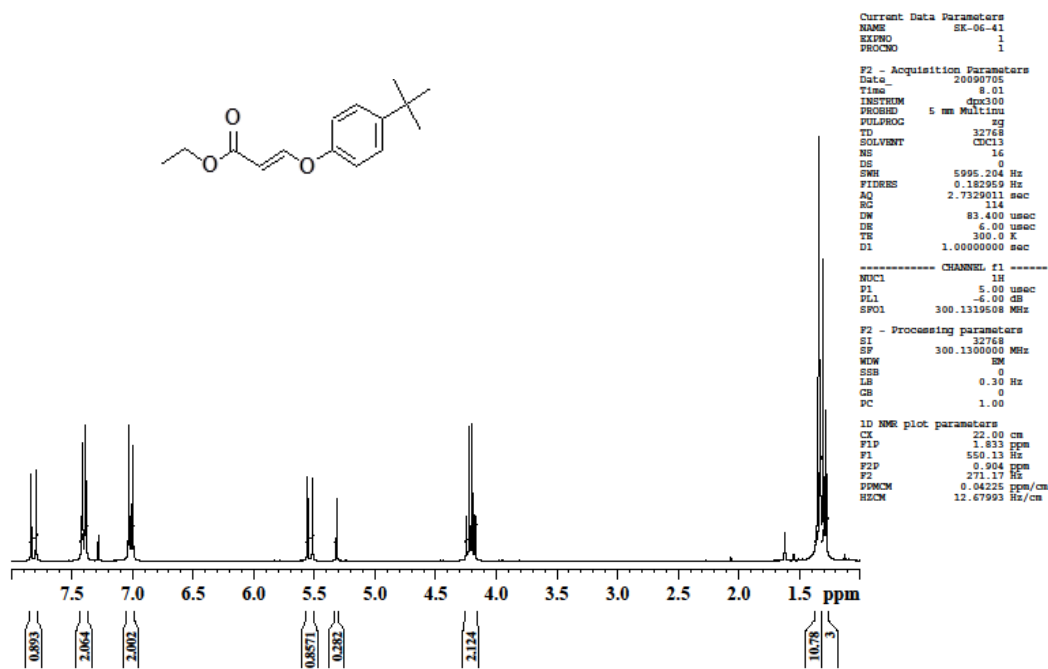**Carbon Spectrum**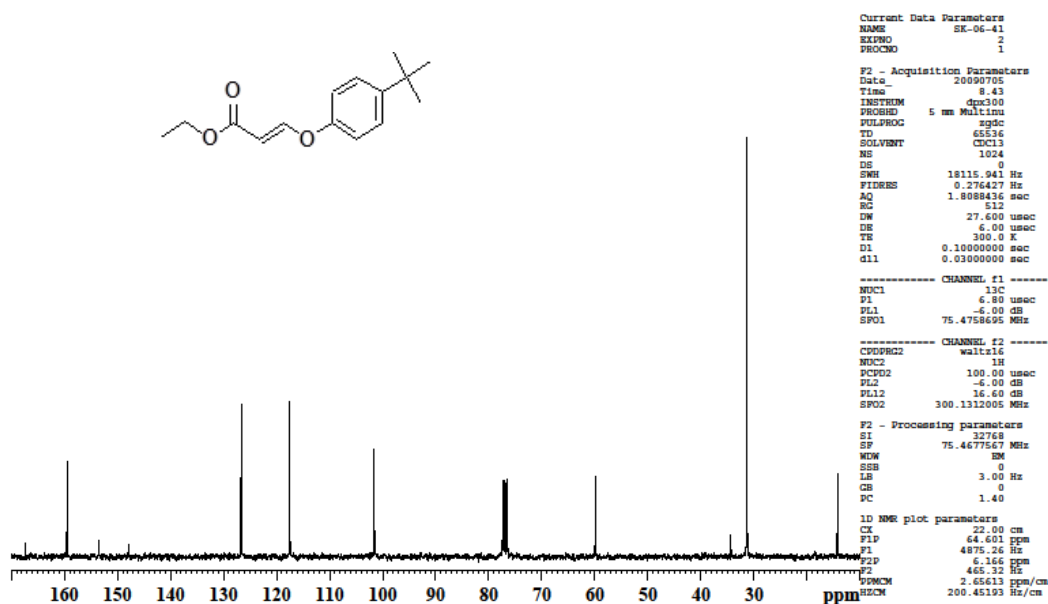

**(E)-Ethyl 3-(4-fluorophenoxy) acrylate (4)****Proton Spectrum**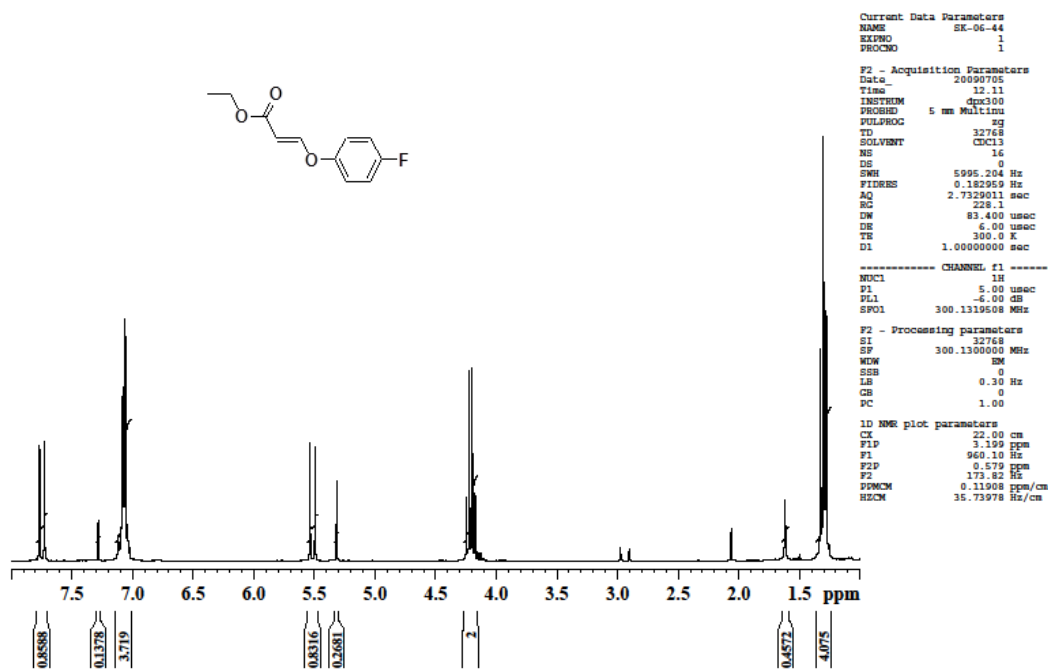**Carbon Spectrum**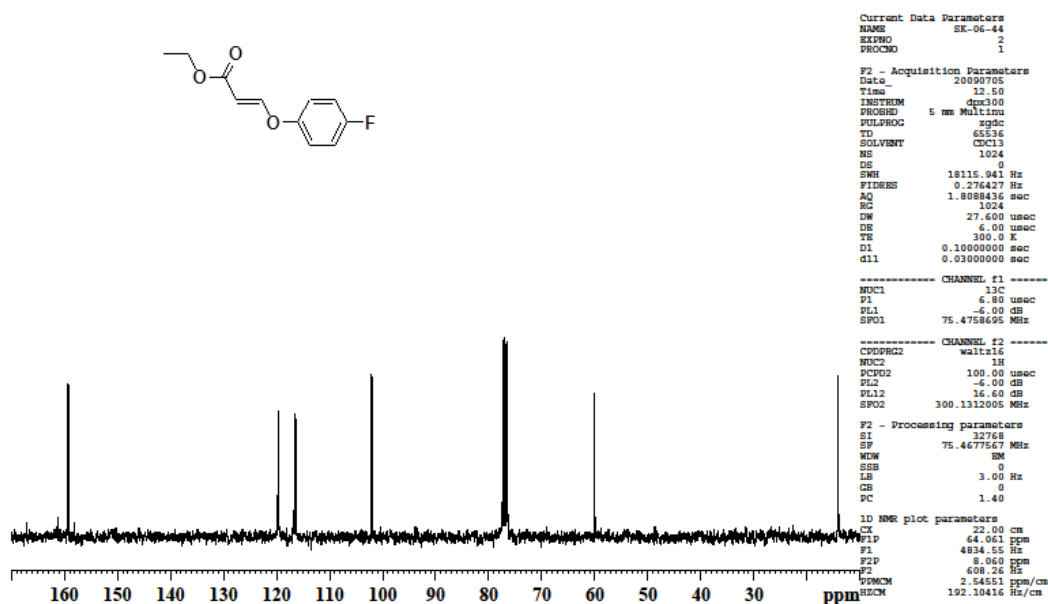

**(E)-Ethyl 3-(2-isopropylphenoxy) acrylate (5)****Proton Spectrum**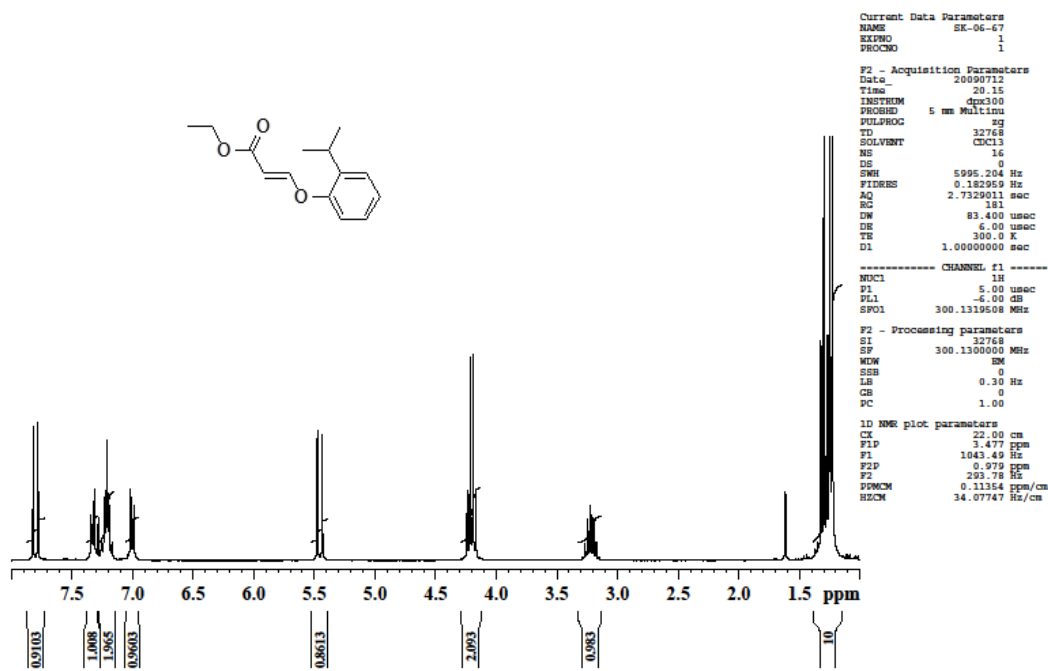**Carbon Spectrum**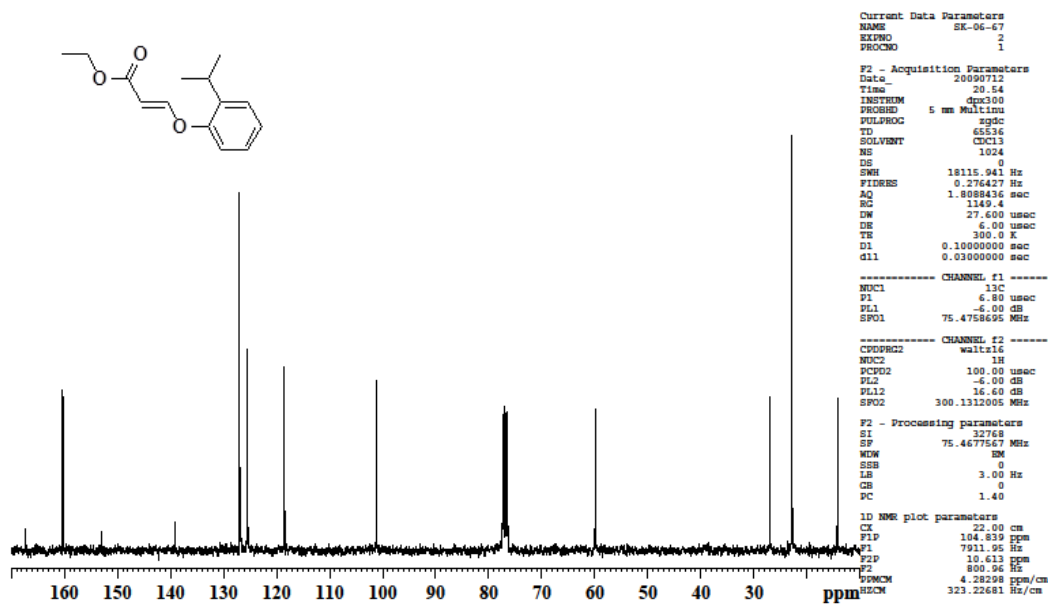

**(E)-Ethyl 3-(naphthalen-1-yloxy) acrylate (6)****Proton Spectrum**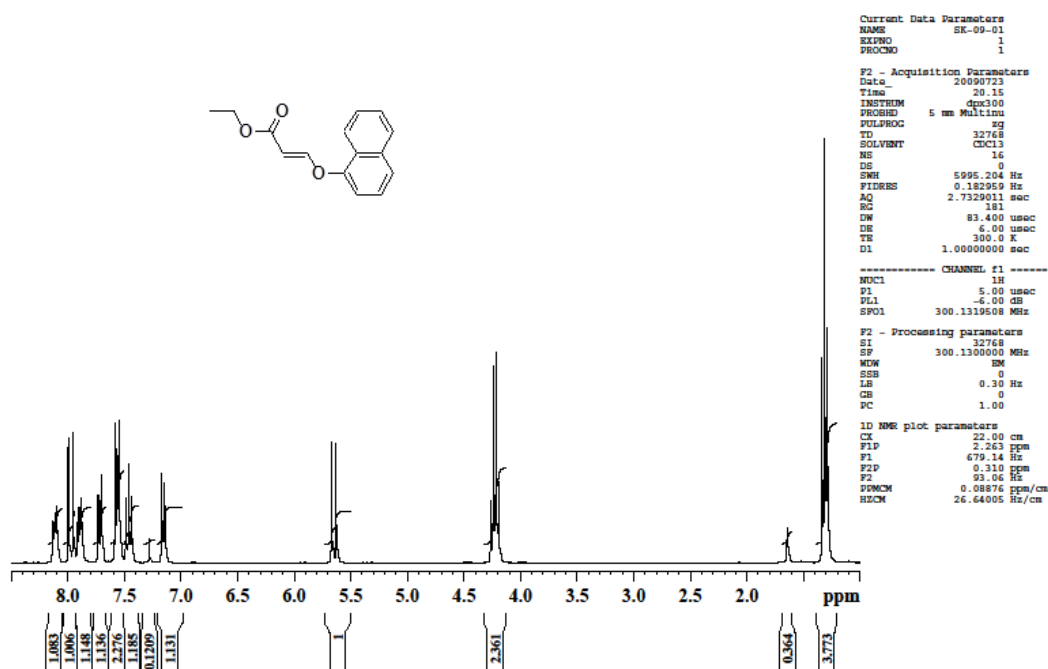**Carbon Spectrum**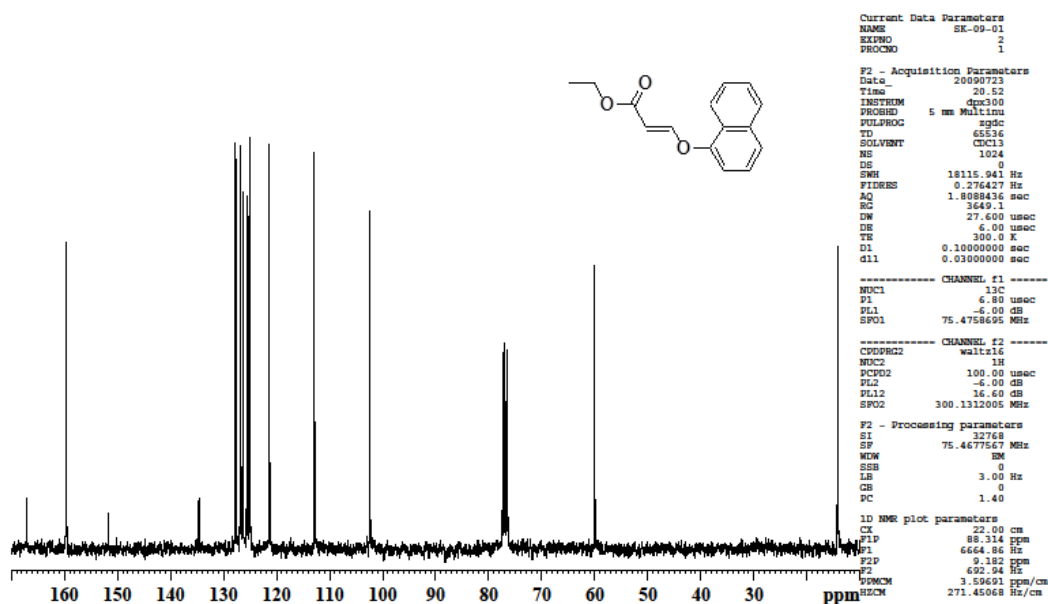

**(E)-Ethyl 3-(benzo[*c*]thiazol-2-yloxy) acrylate (7)****Proton Spectrum**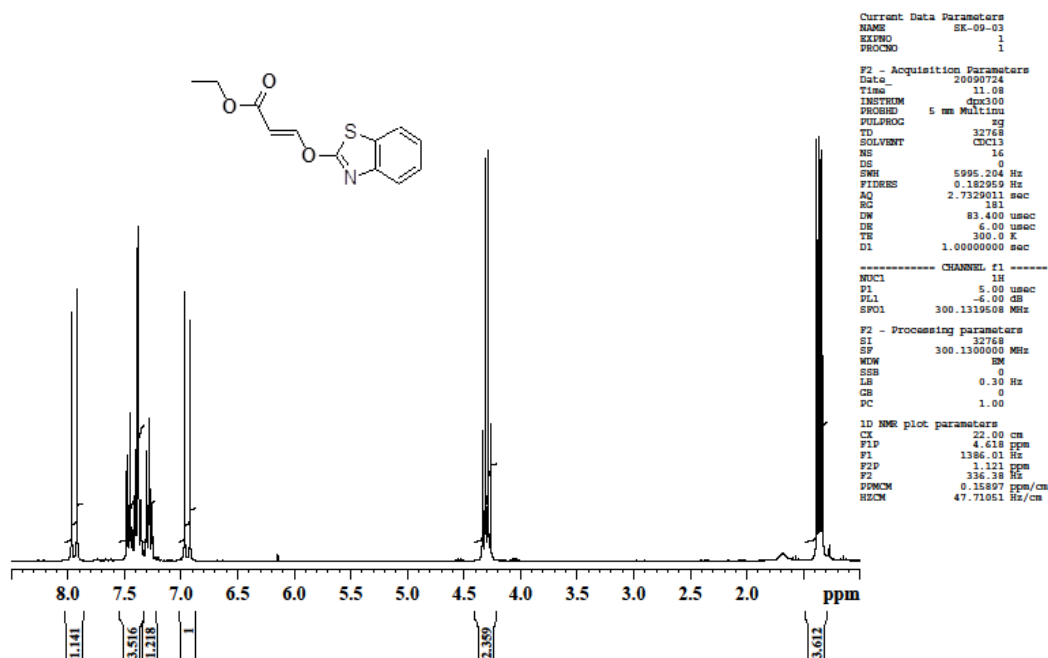**Carbon Spectrum**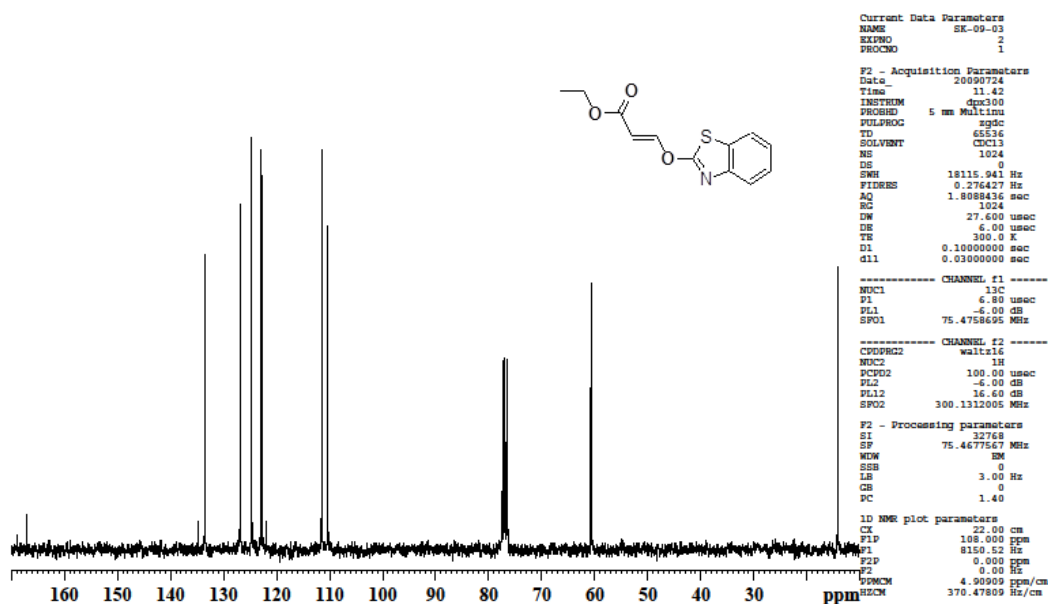

**(E)-Ethyl 3-(pyridin-3-yloxy) acrylate (8)****Proton Spectrum**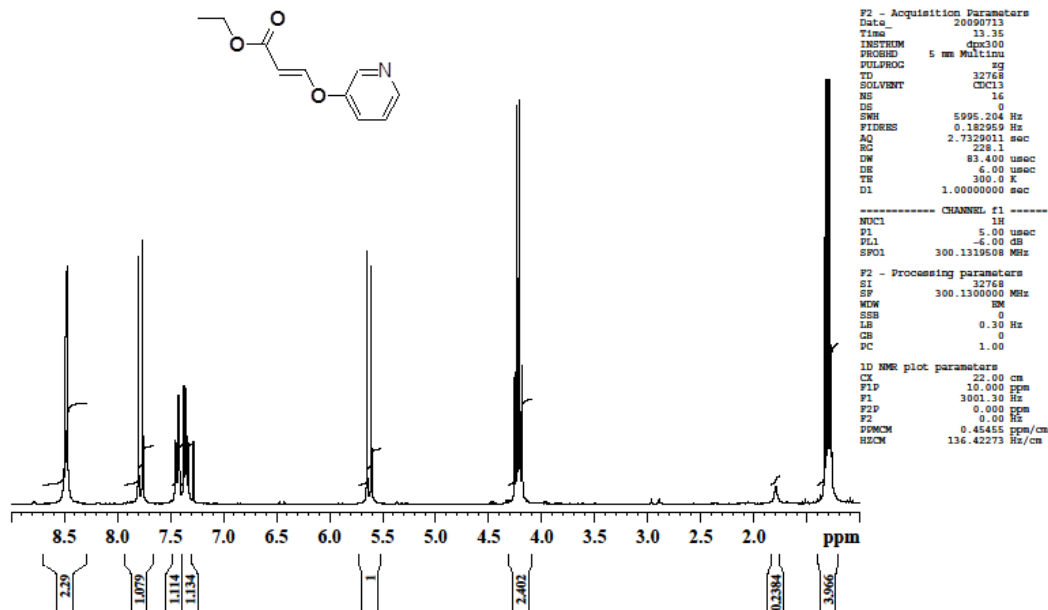**Carbon Spectrum**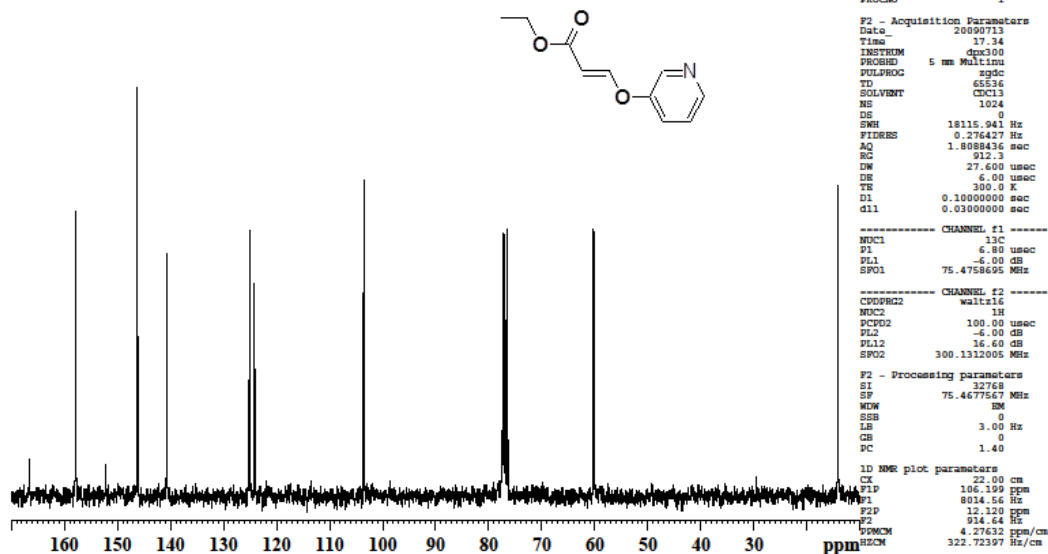



**(E)-Ethyl 3-(1*H*-pyrazol-1-yl) acrylate (9)**

ON-II-02 Proton Spectrum

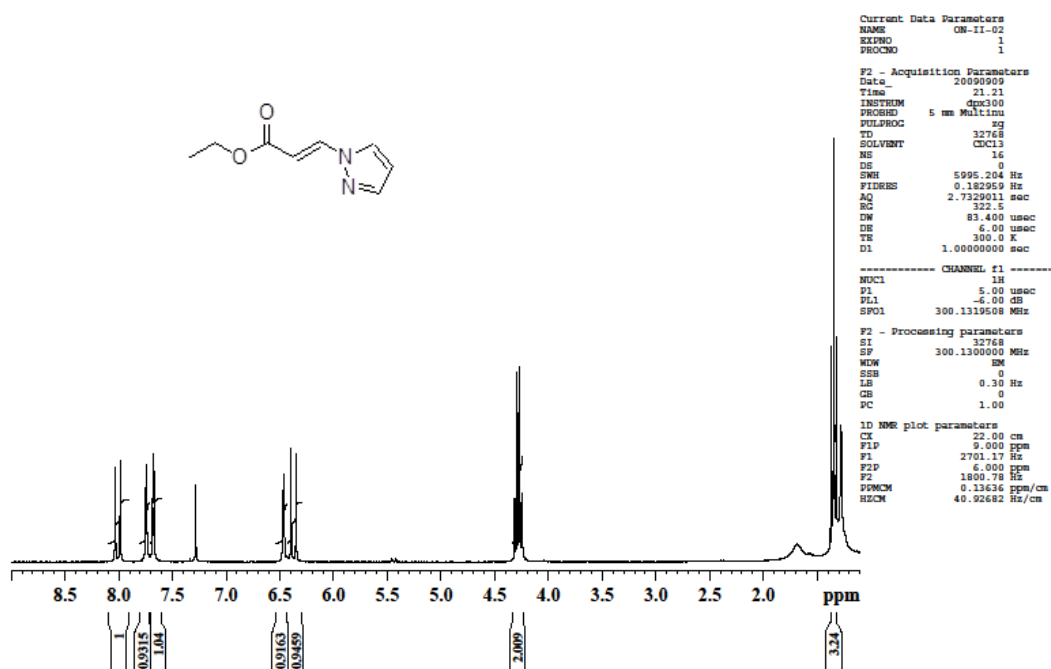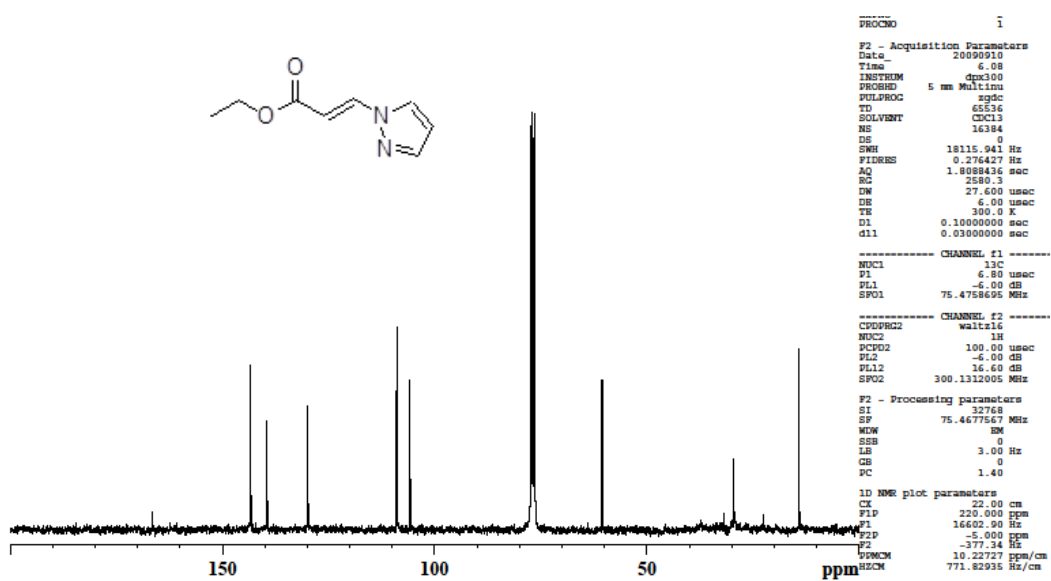

## (E)-Ethyl-3-(5-(methylthio)-1H-tetrazol-1-yl) acrylate (10)

## Proton Spectrum

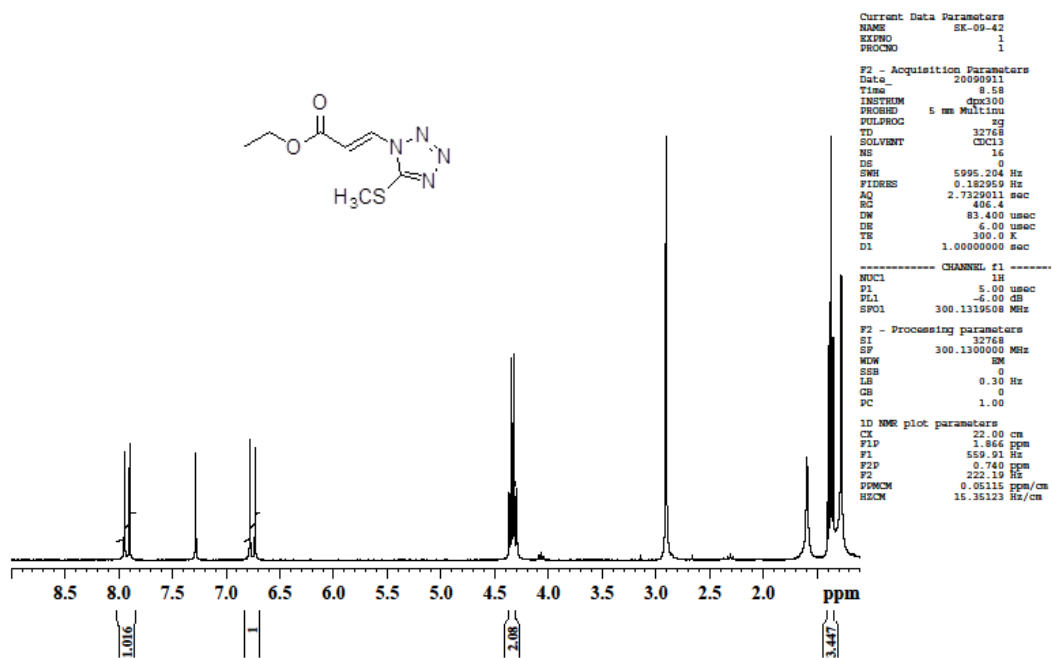

**(E)-Ethyl 3-(1*H*-indol-1-yl) acrylate (11)**

ON-II-27-B Proton Spectrum

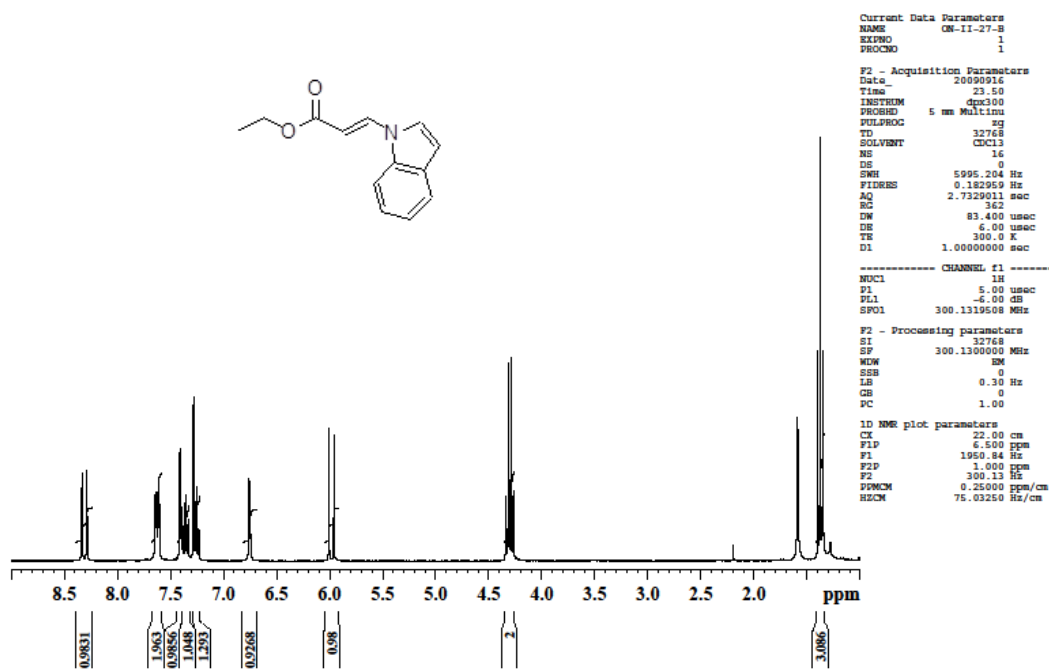

ON-II-27-B Carbon Spectrum

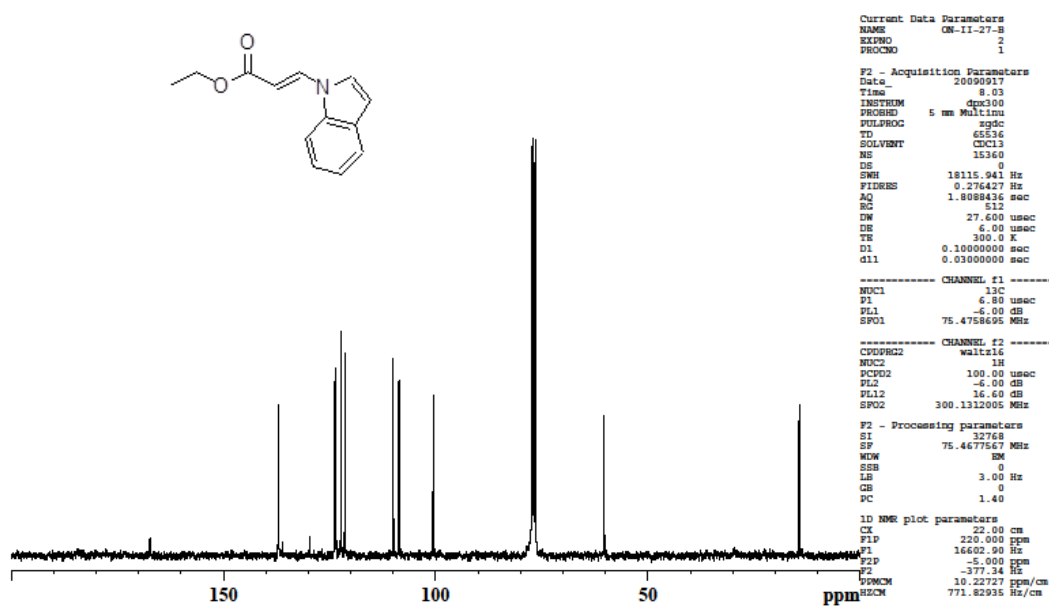

**(E)-Ethyl 3-(1*H*-indazol-1-yl) acrylate (12)**

ON-II-28 Proton Spectrum

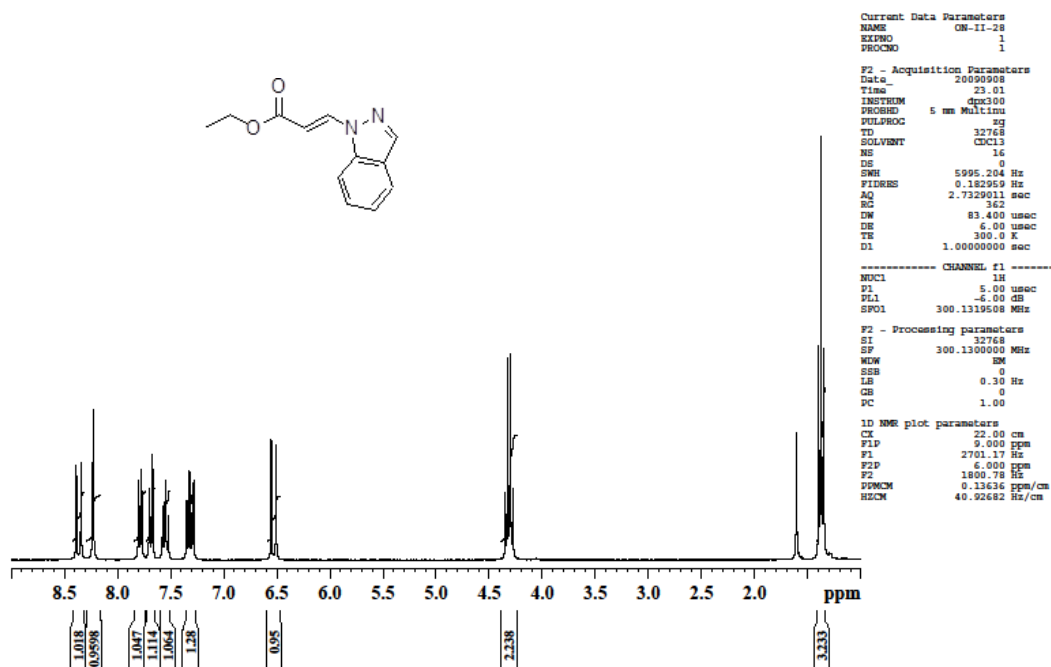

ON-II-28 Carbon Spectrum

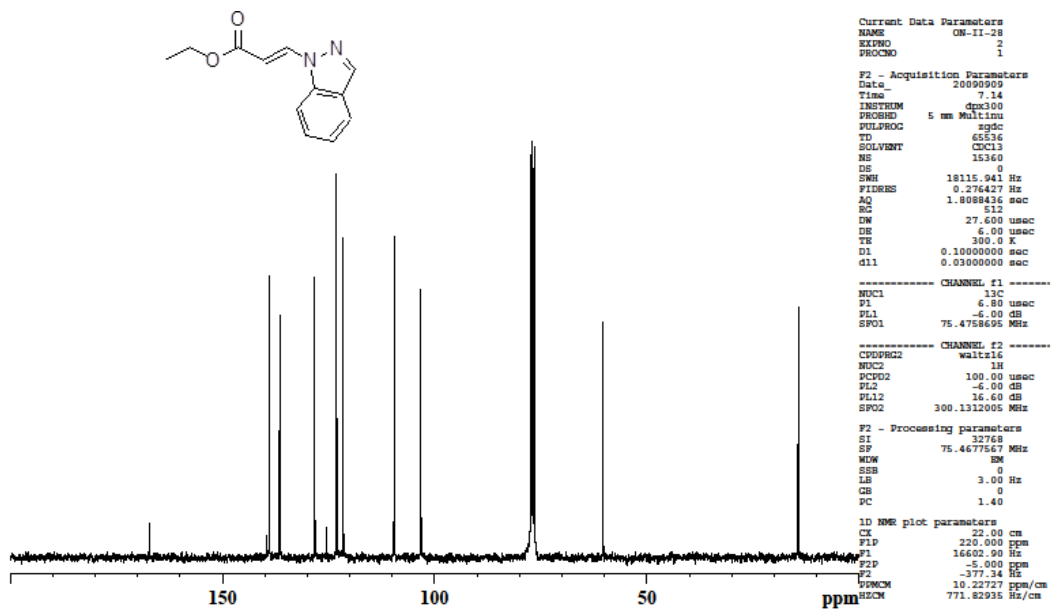

**(E)-Ethyl-3-(1H-benzo[d][1,2,3]triazol-1-yl) acrylate (13)****Proton Spectrum**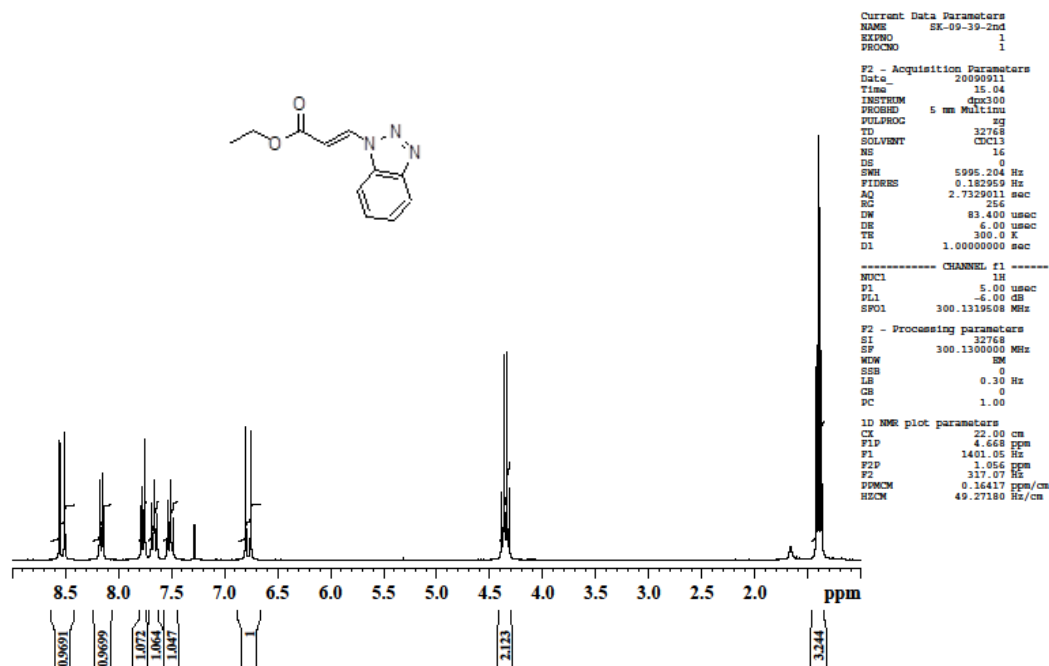**Carbon Spectrum**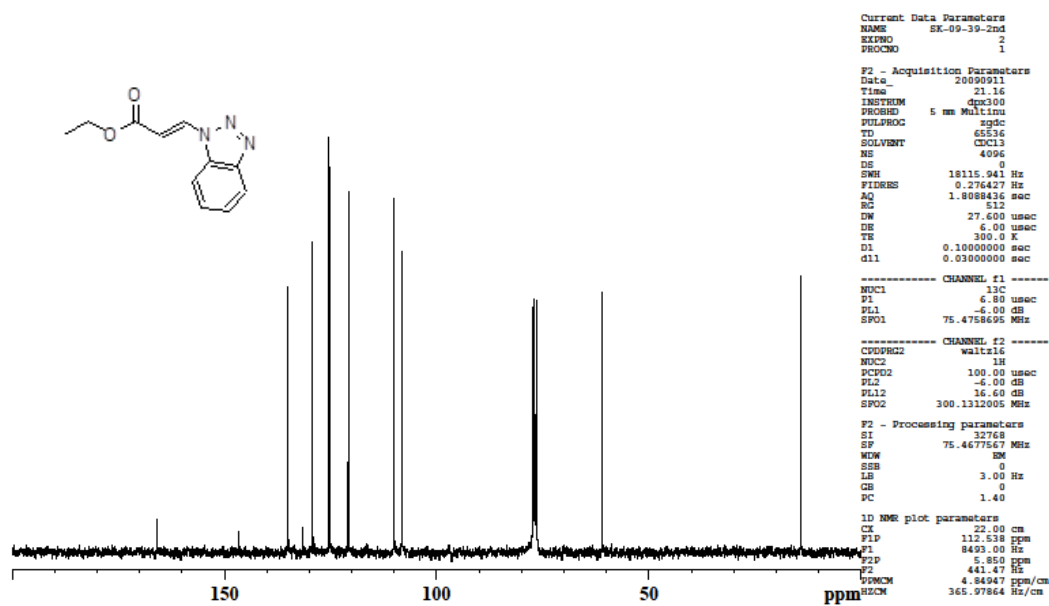

**(E)-Ethyl 3-(1H-imidazol-1-yl) acrylate (14)****Proton Spectrum**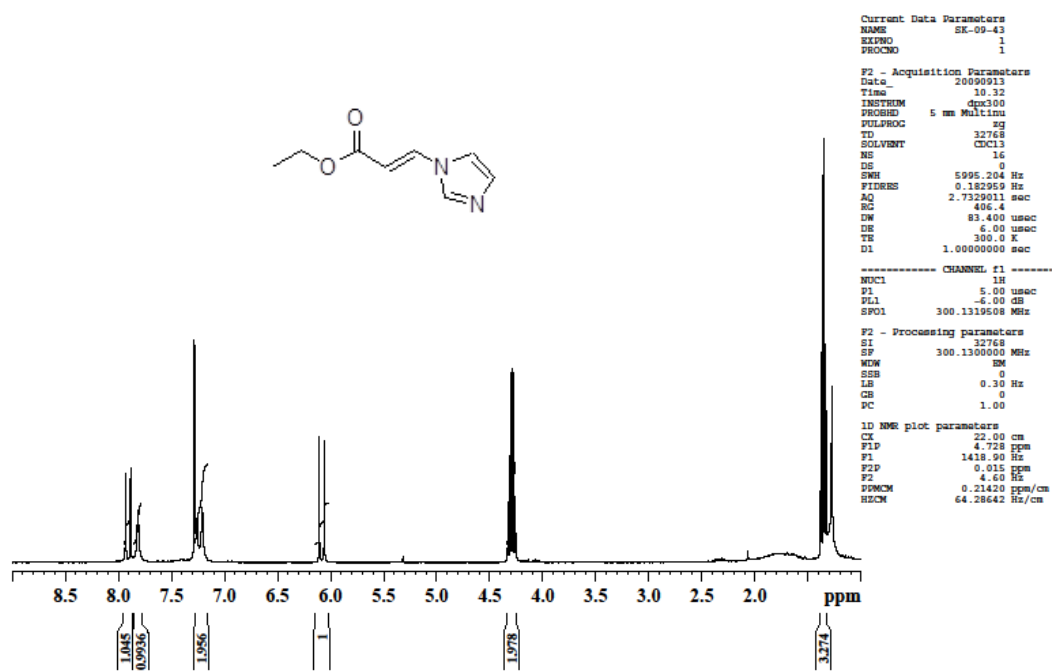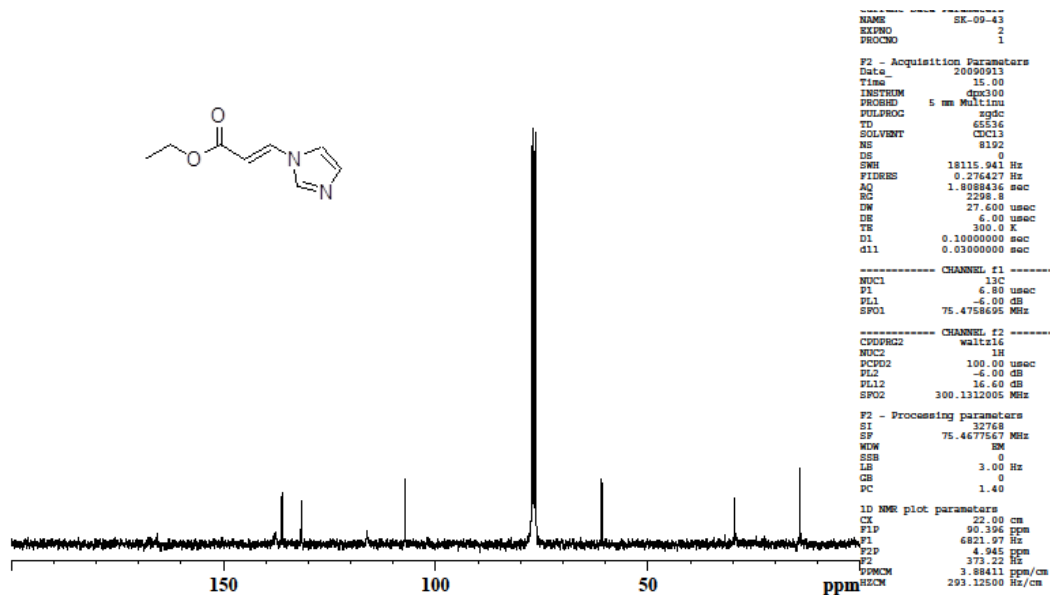

## (E)-Ethyl 3-(1H-1,2,4-triazol-1-yl) acrylate (15)

## Proton Spectrum

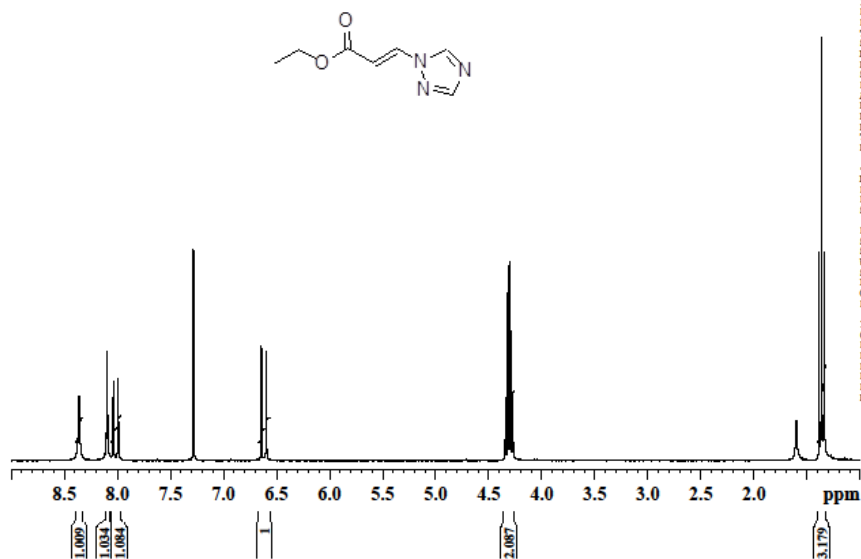

## Carbon Spectrum

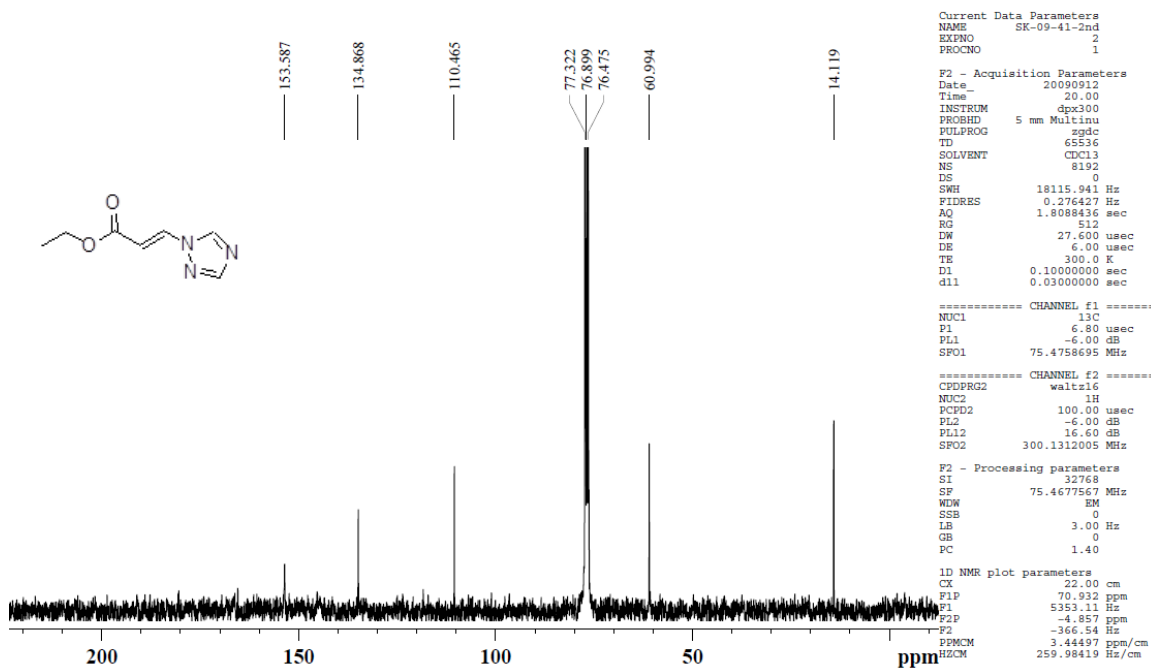

## (Z)-Ethyl 3-(3,5-Dimethoxy-phenoxy)-acrylate (16)

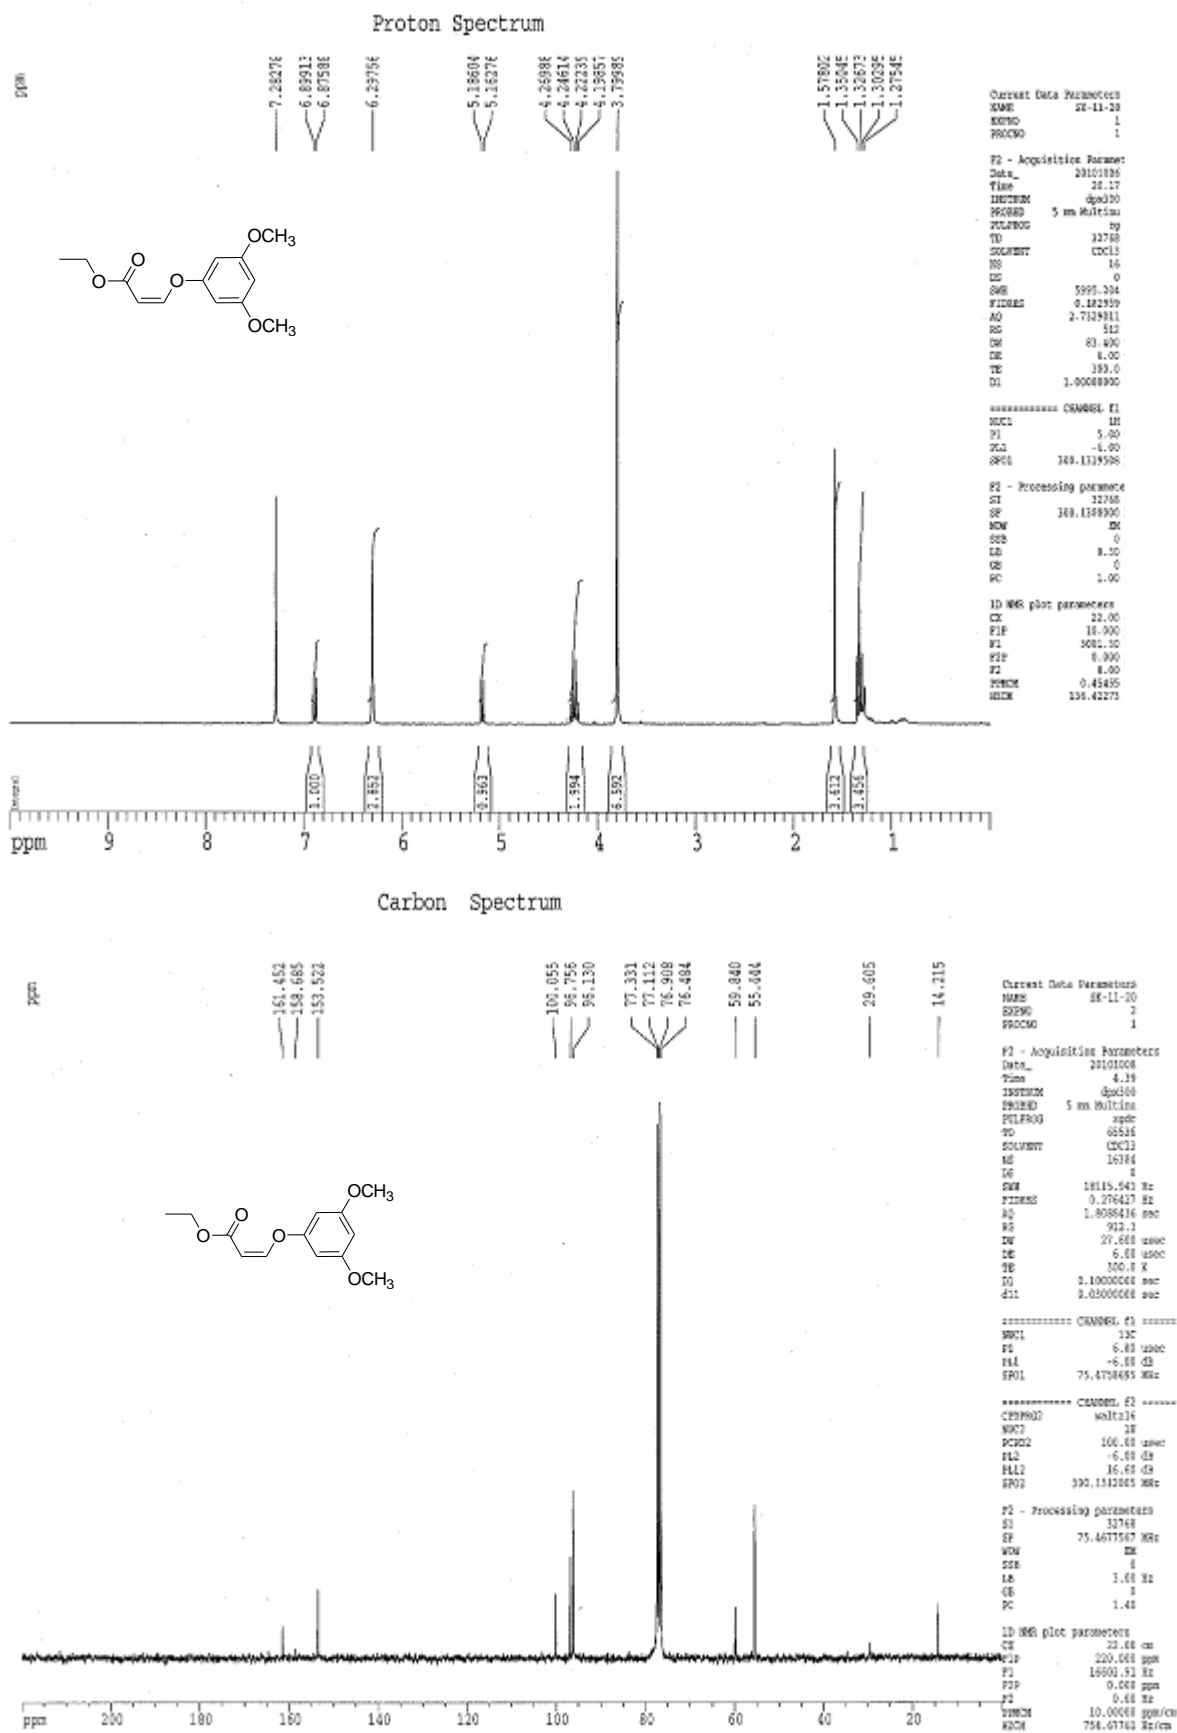



**(Z)-Ethyl 3-(4-tert-Butyl-phenoxy)-acrylate (17)**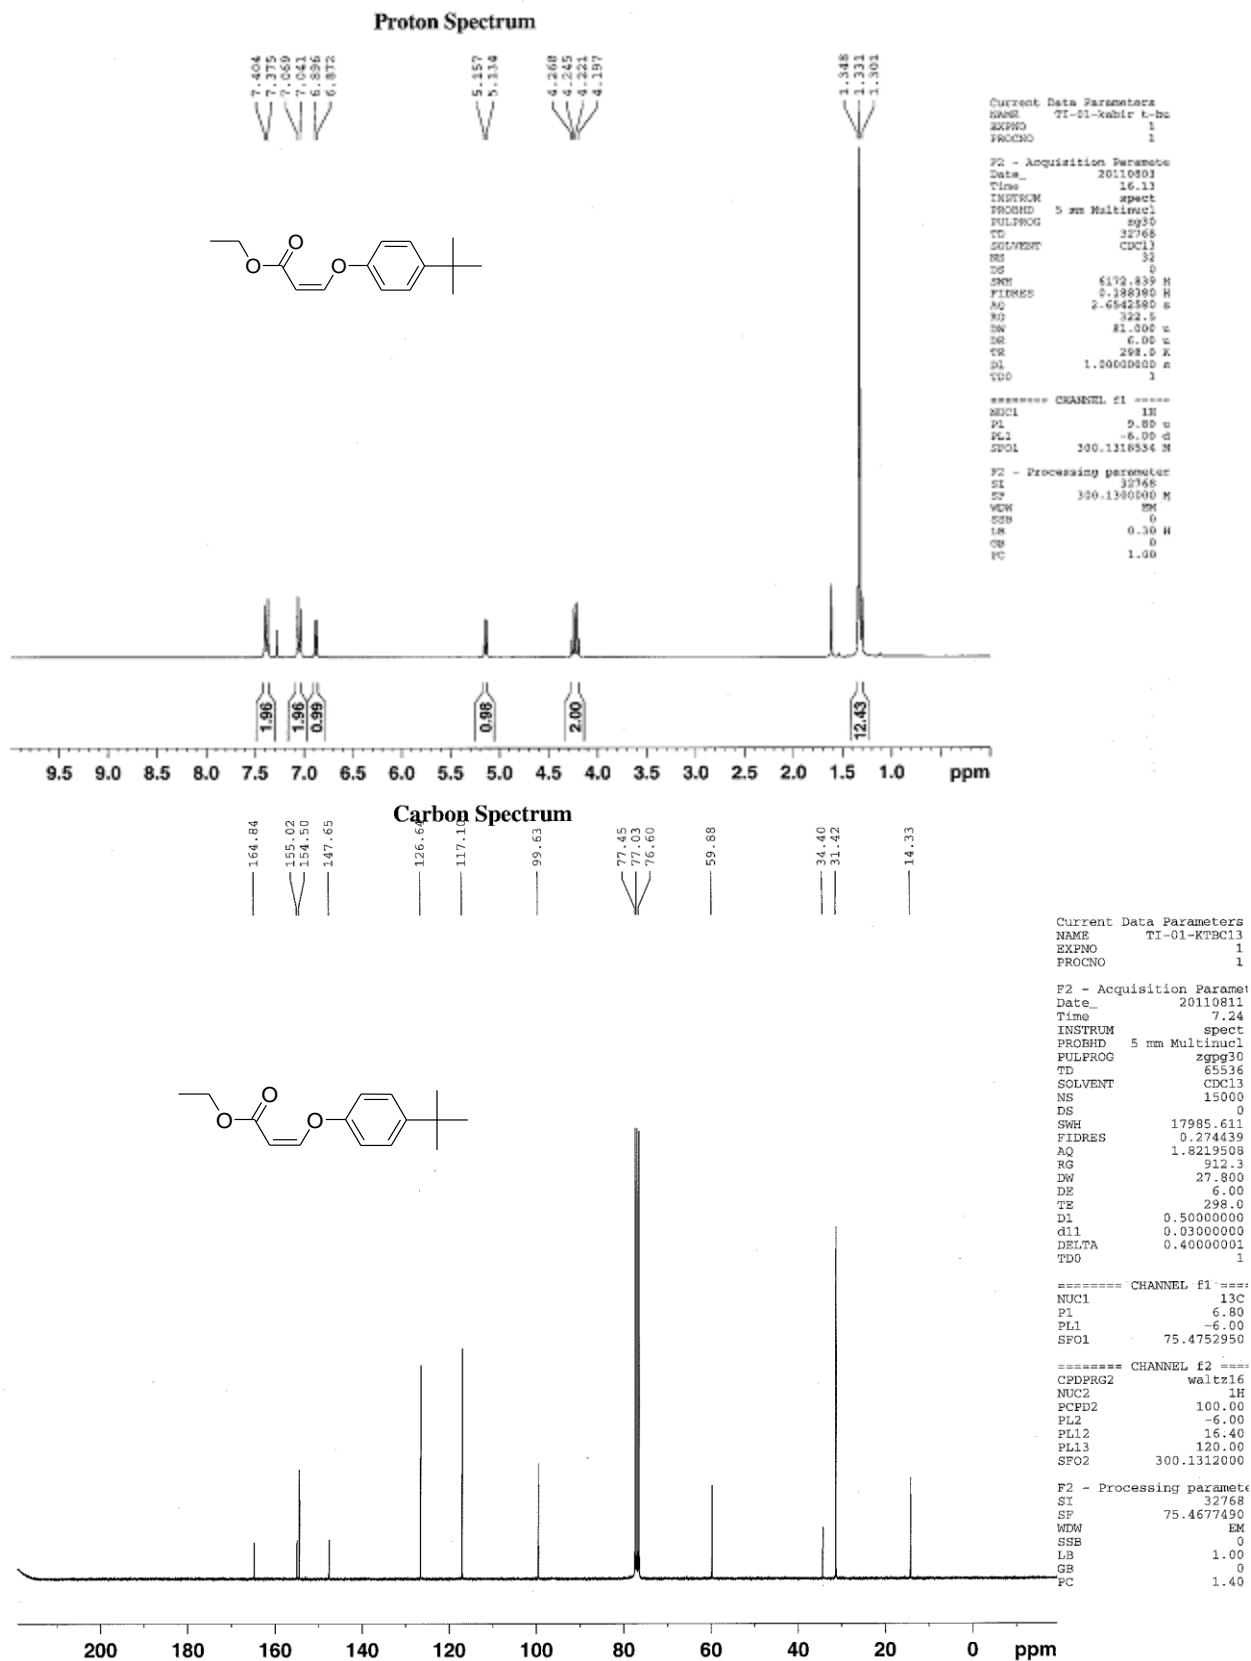



**(Z)-Ethyl 3-(2-Isopropyl-phenoxy) acrylate (19)**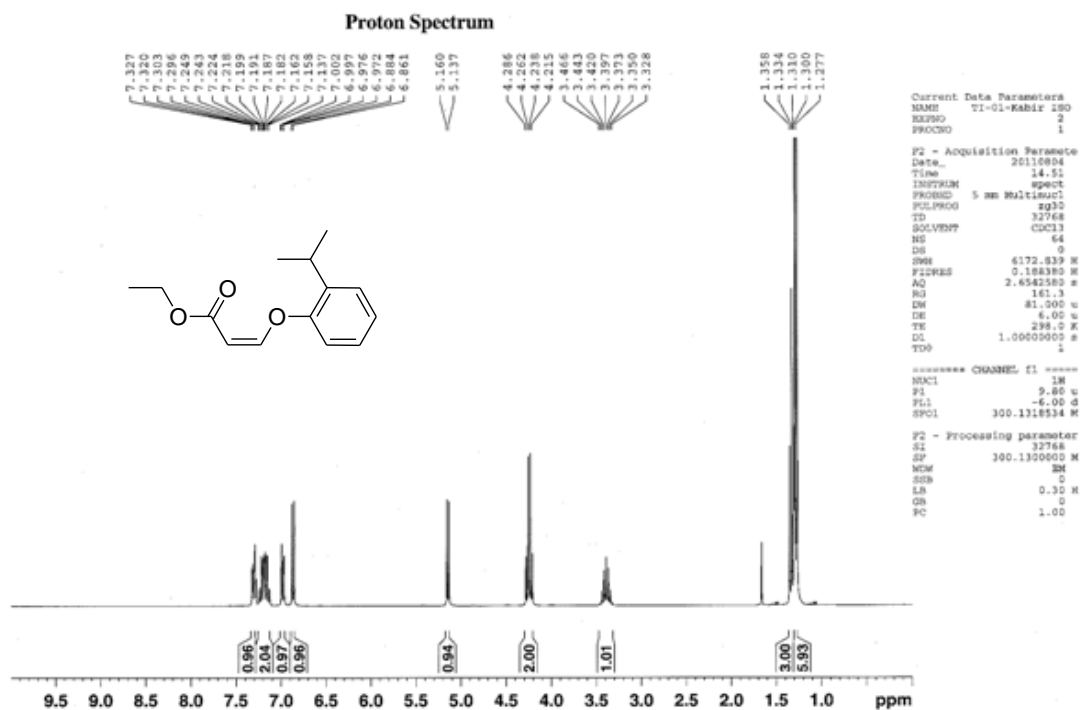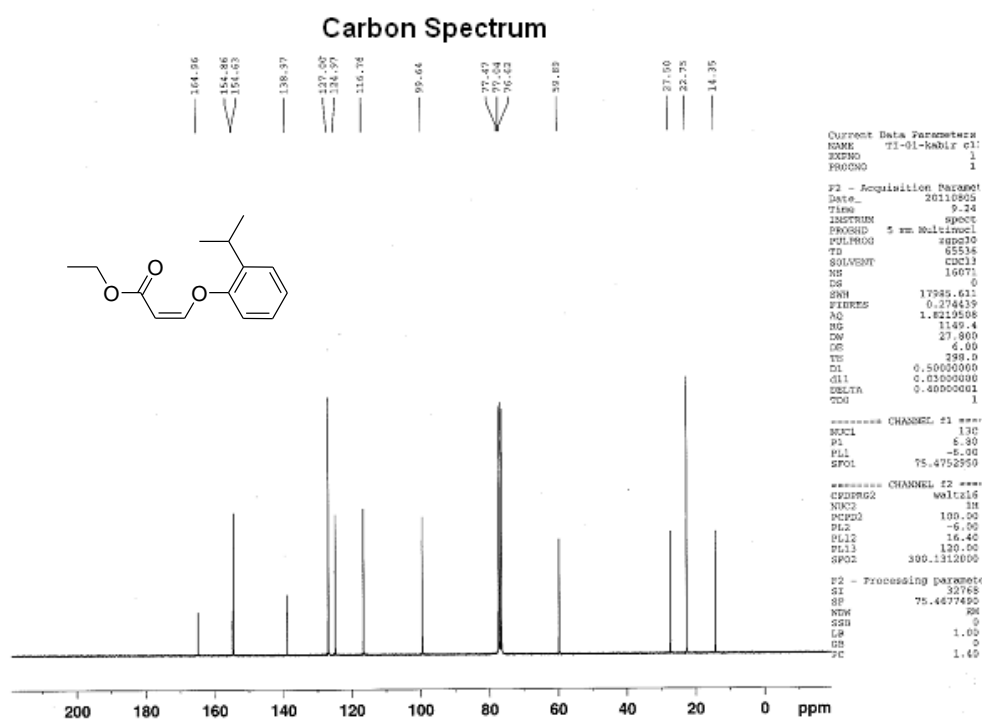

**(Z)-Ethyl 3-(Naphthalen-1-yloxy) acrylate (20)**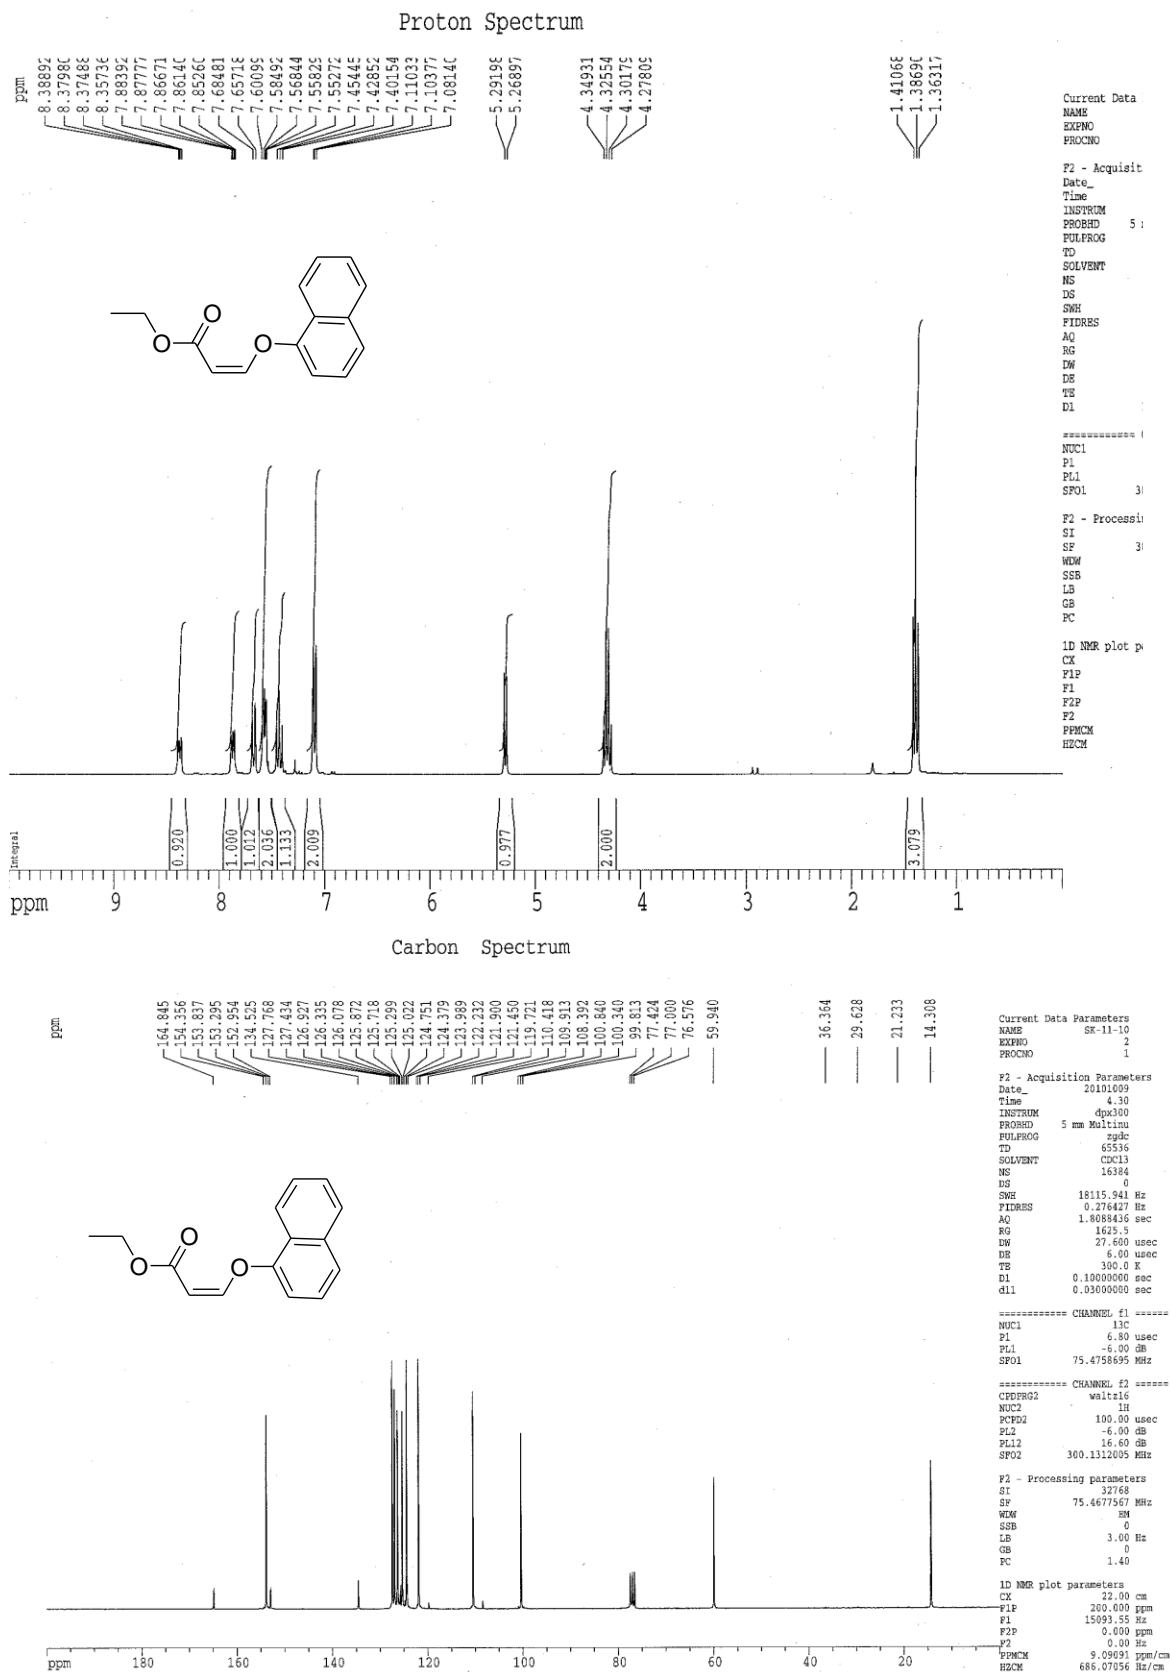

**(Z)-Ethyl 3-(Pyridin-3-yloxy) acrylate (21)**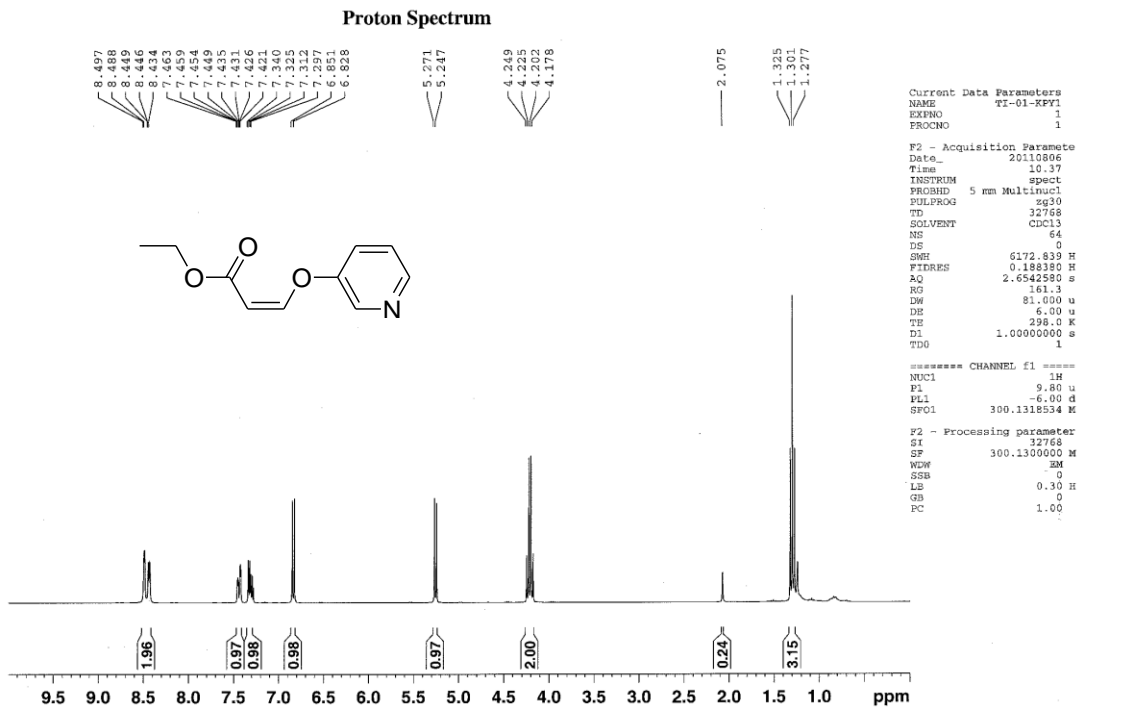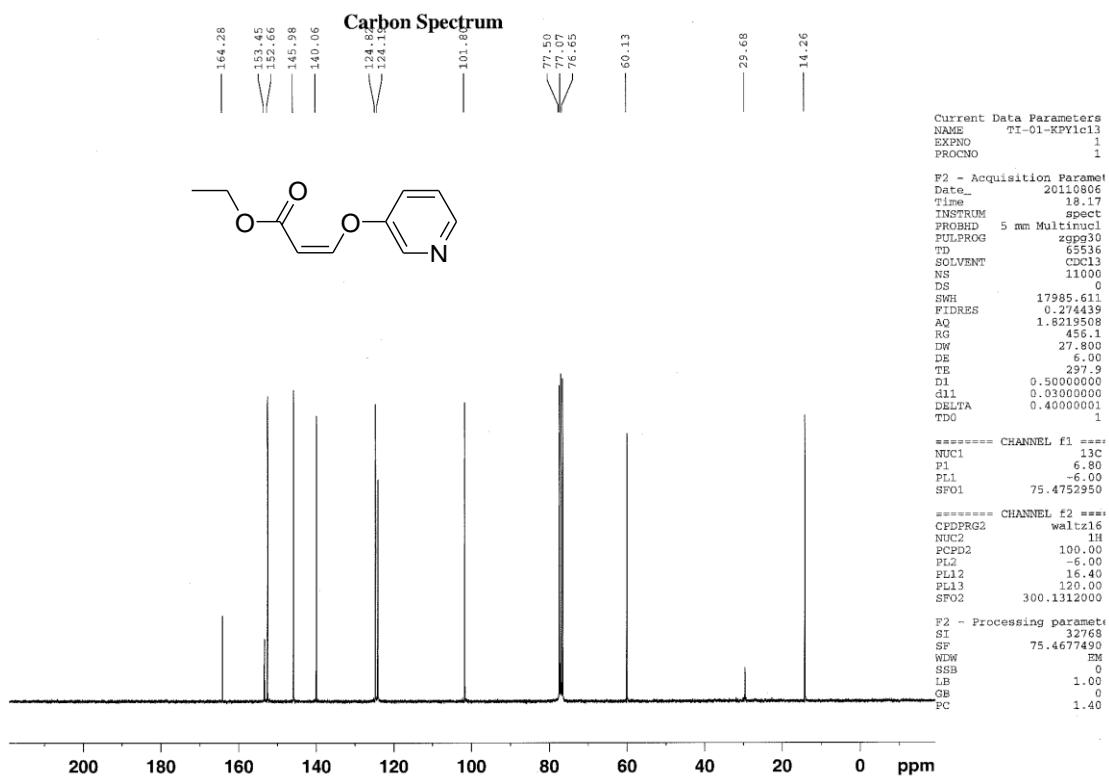

**(Z)-Ethyl 3-(1H-pyrazol-1-yl) acrylate (22)**

Proton Spectrum

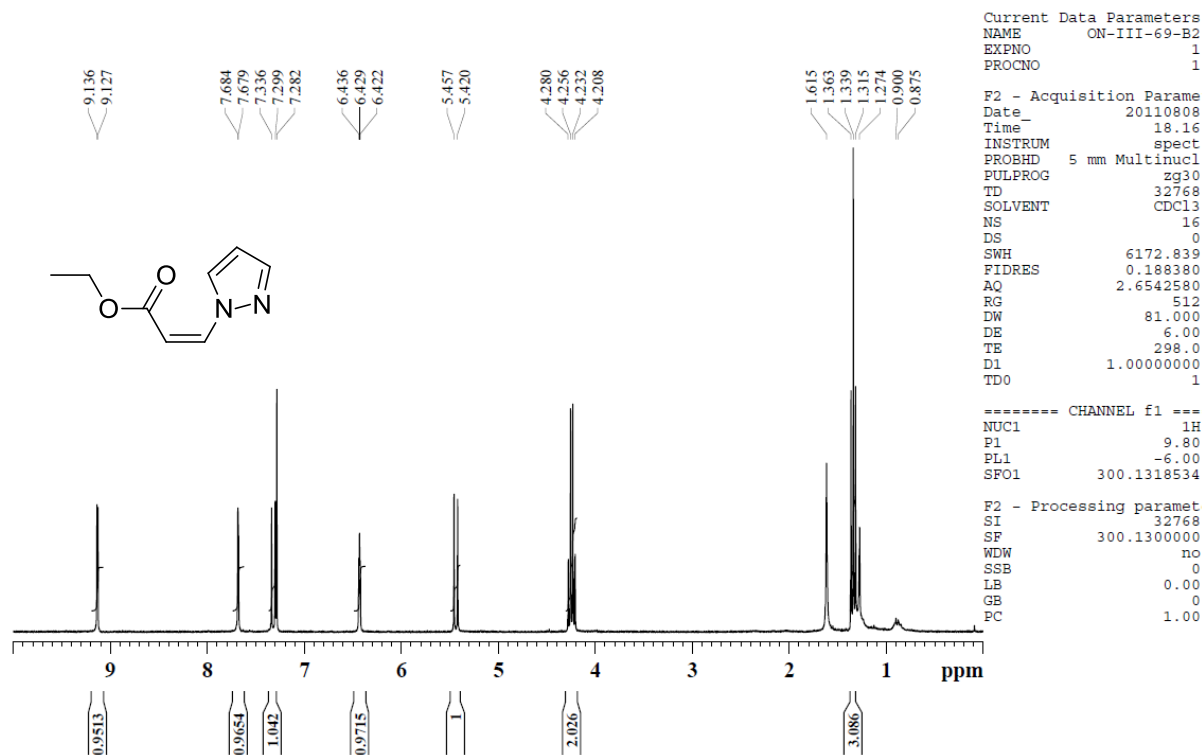

Carbon Spectrum

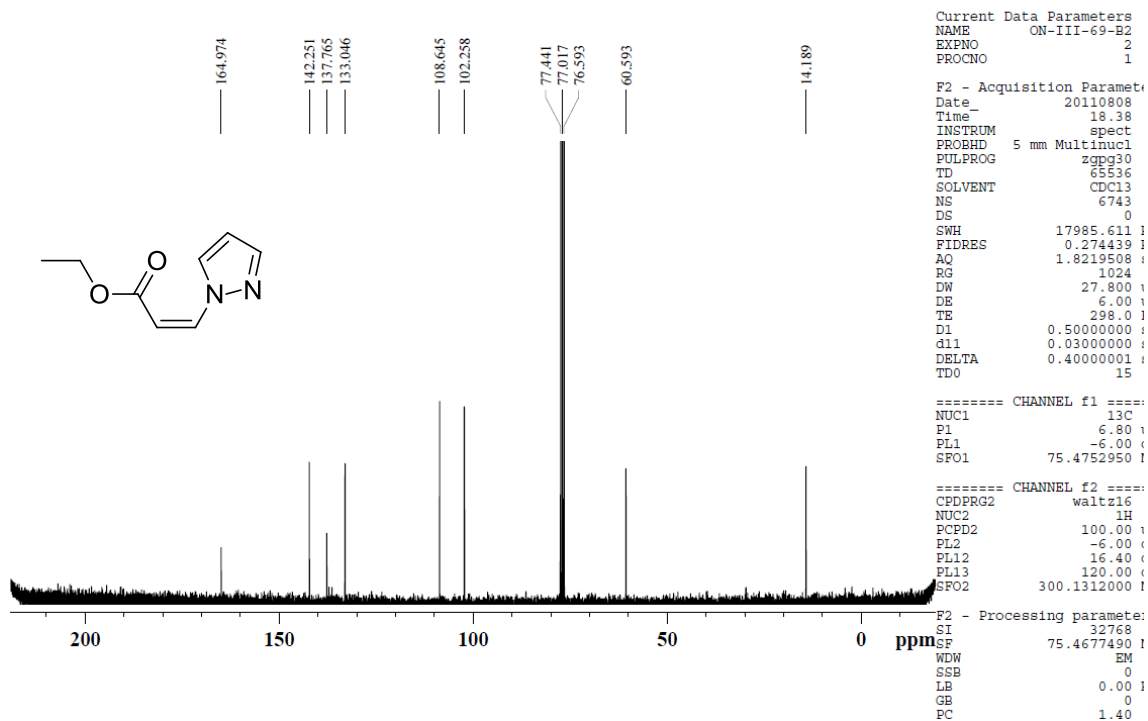

**(Z)-Ethyl 3-(3-(trifluoromethyl)-1H-pyrazol-1-yl) acrylate (23)**

## Proton Spectrum

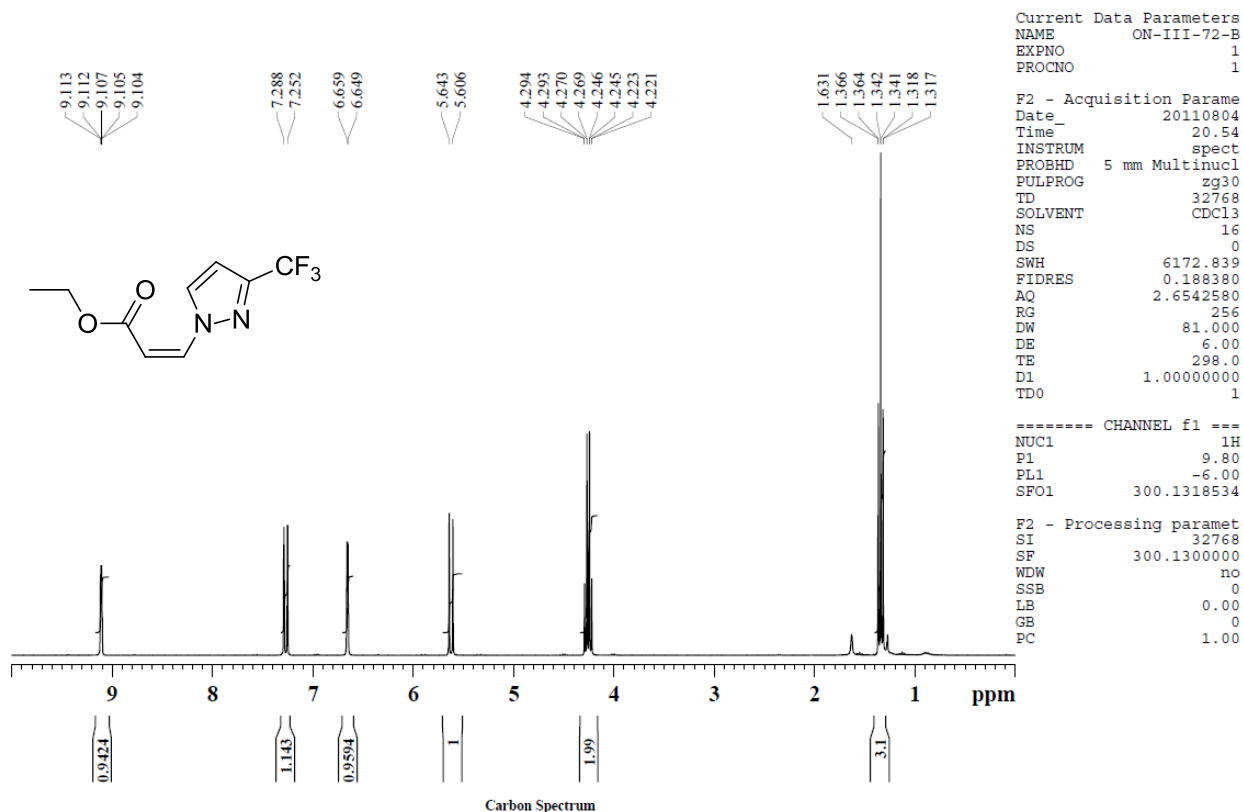

## Carbon Spectrum

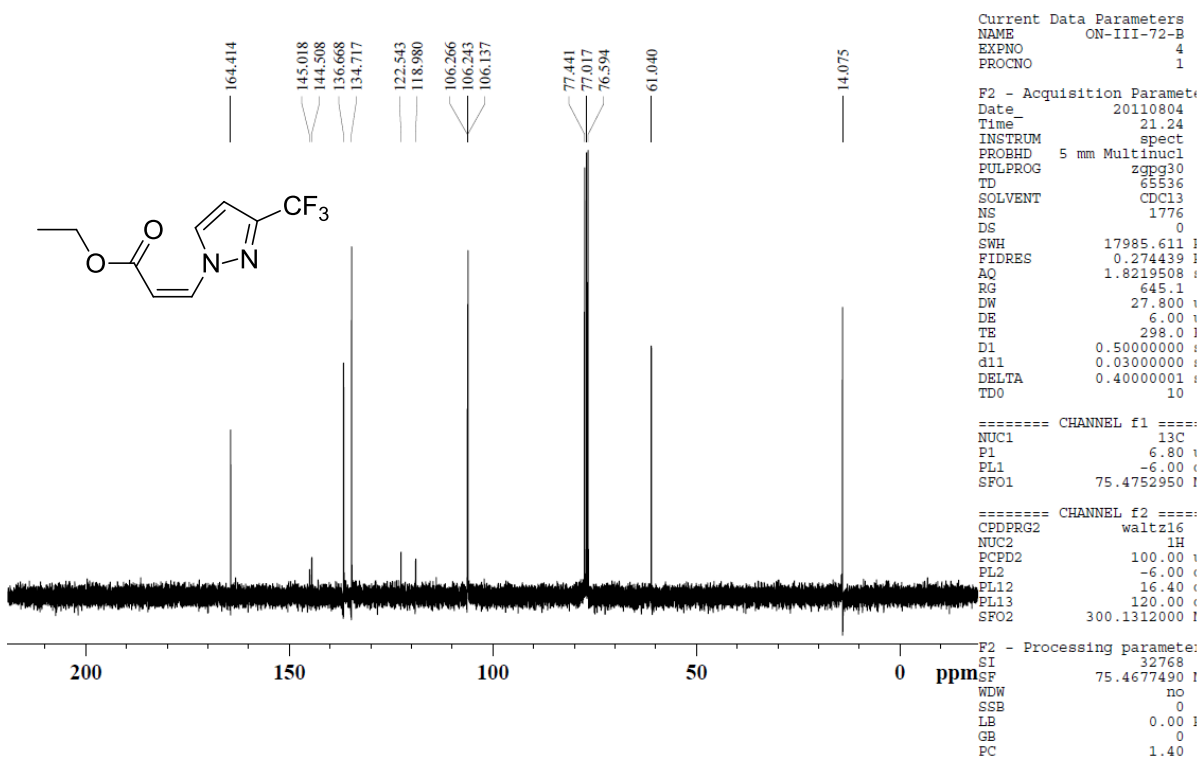

**(Z)-Ethyl 3-(1H-indazol-1-yl) acrylate (24)****Proton Spectrum**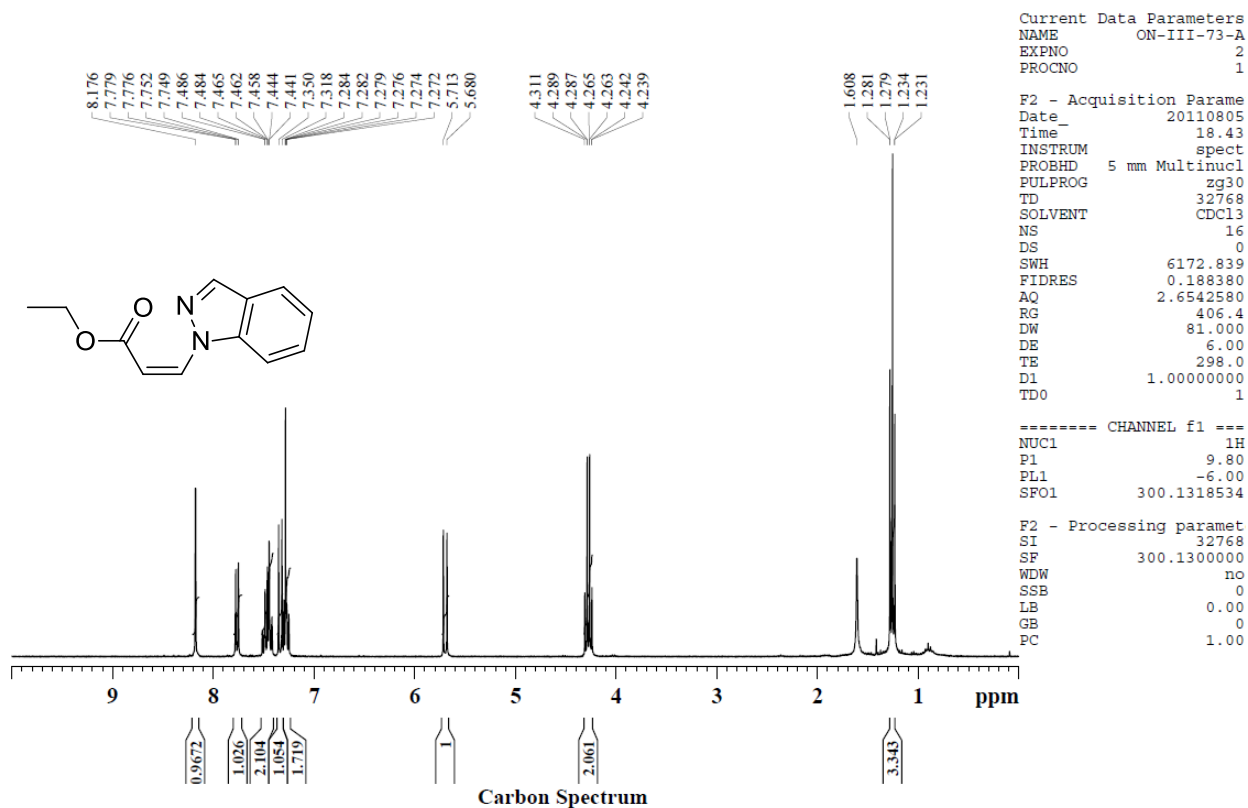**Carbon Spectrum**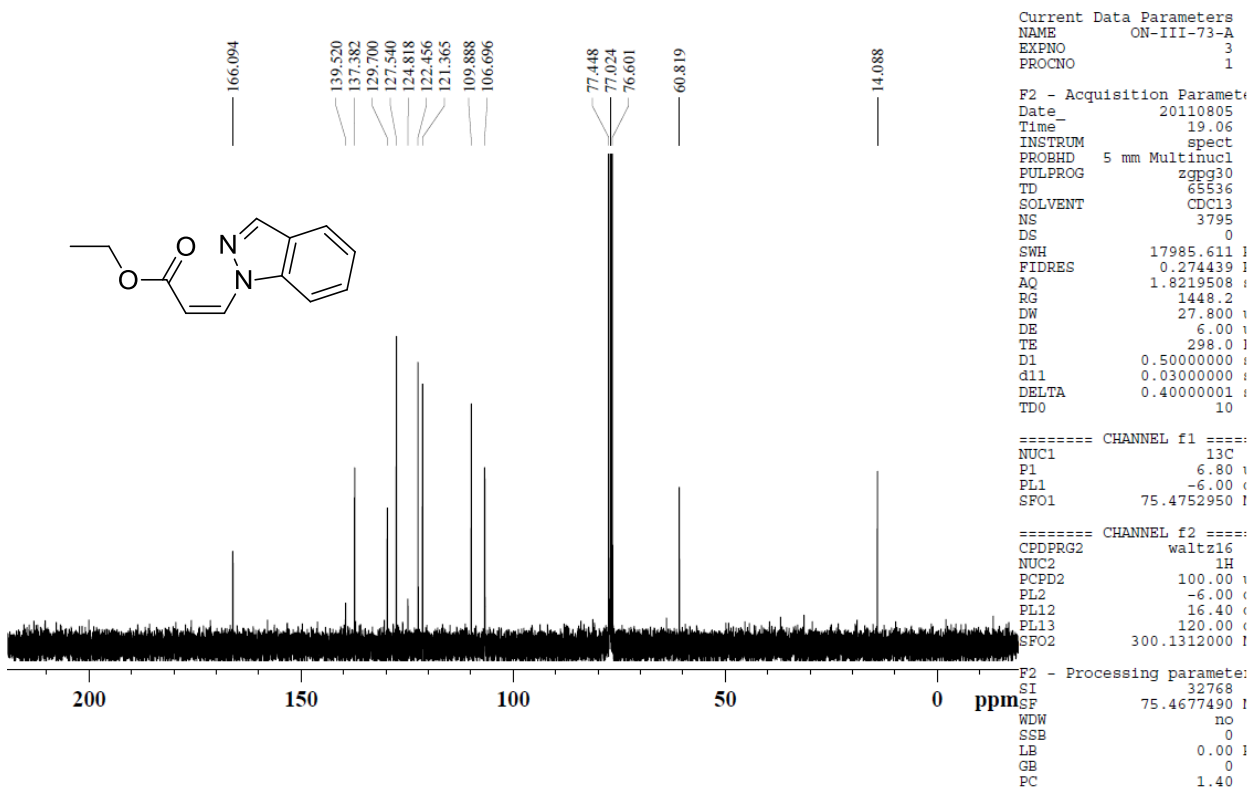



**(Z)-Ethyl 3-(1H-benzo[d][1,2,3]triazol-1-yl)acrylate (25)**  
**Proton Spectrum**

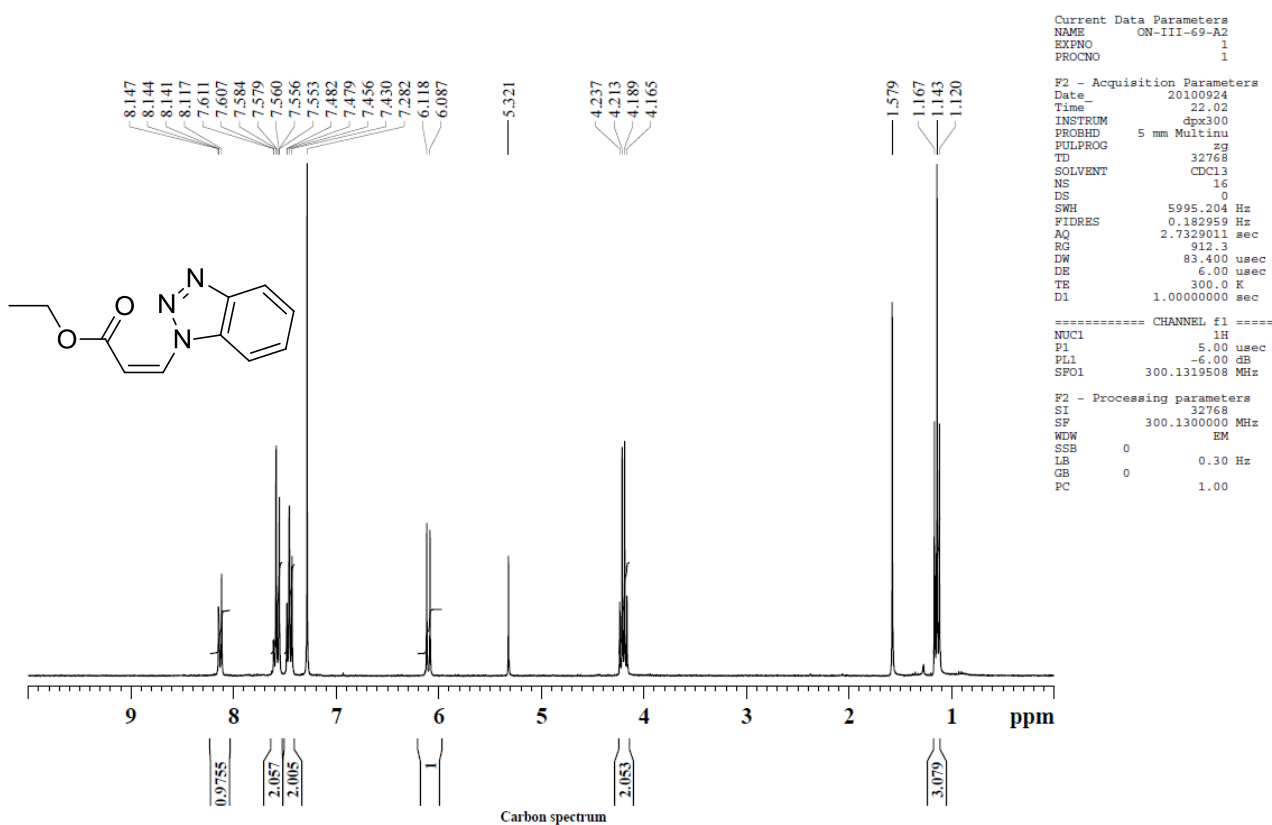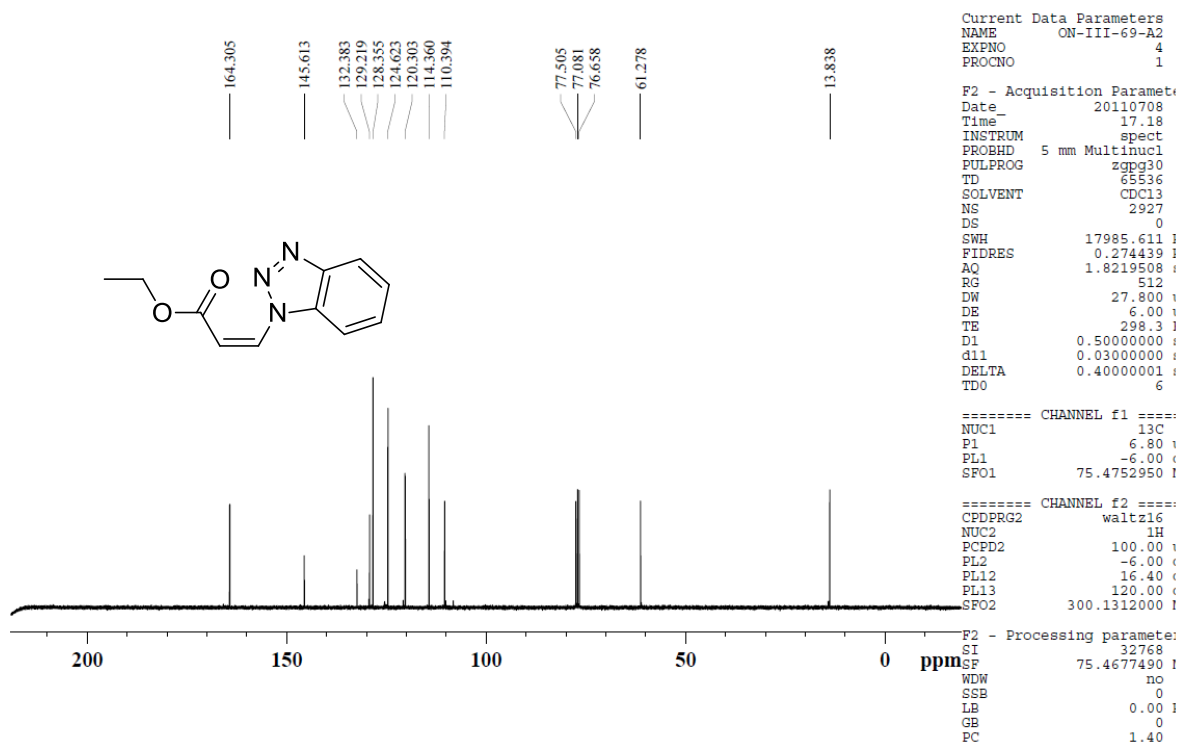

**(Z)-Ethyl 3-(3-methyl-1H-pyrazol-1-yl)acrylate (26)**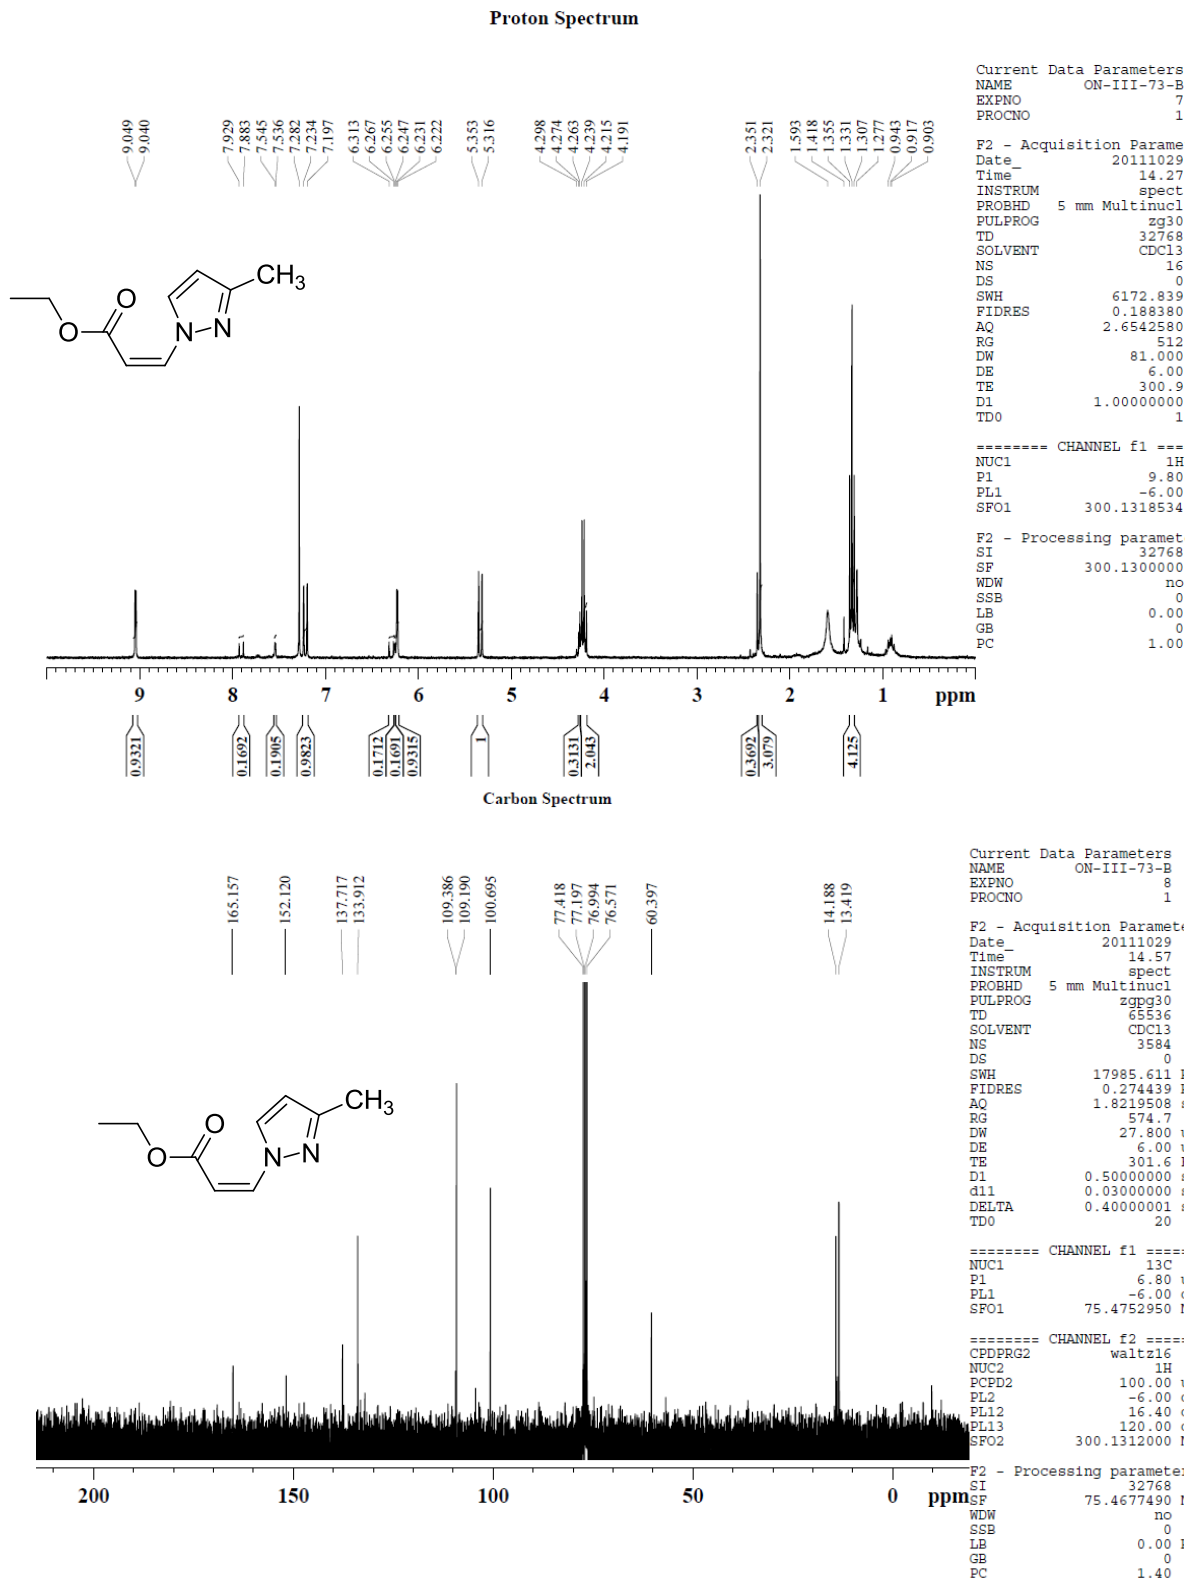

**(Z)-Ethyl 3-(1H-1,2,4-triazol-1-yl)acrylate (27)**  
**Proton Spectrum**

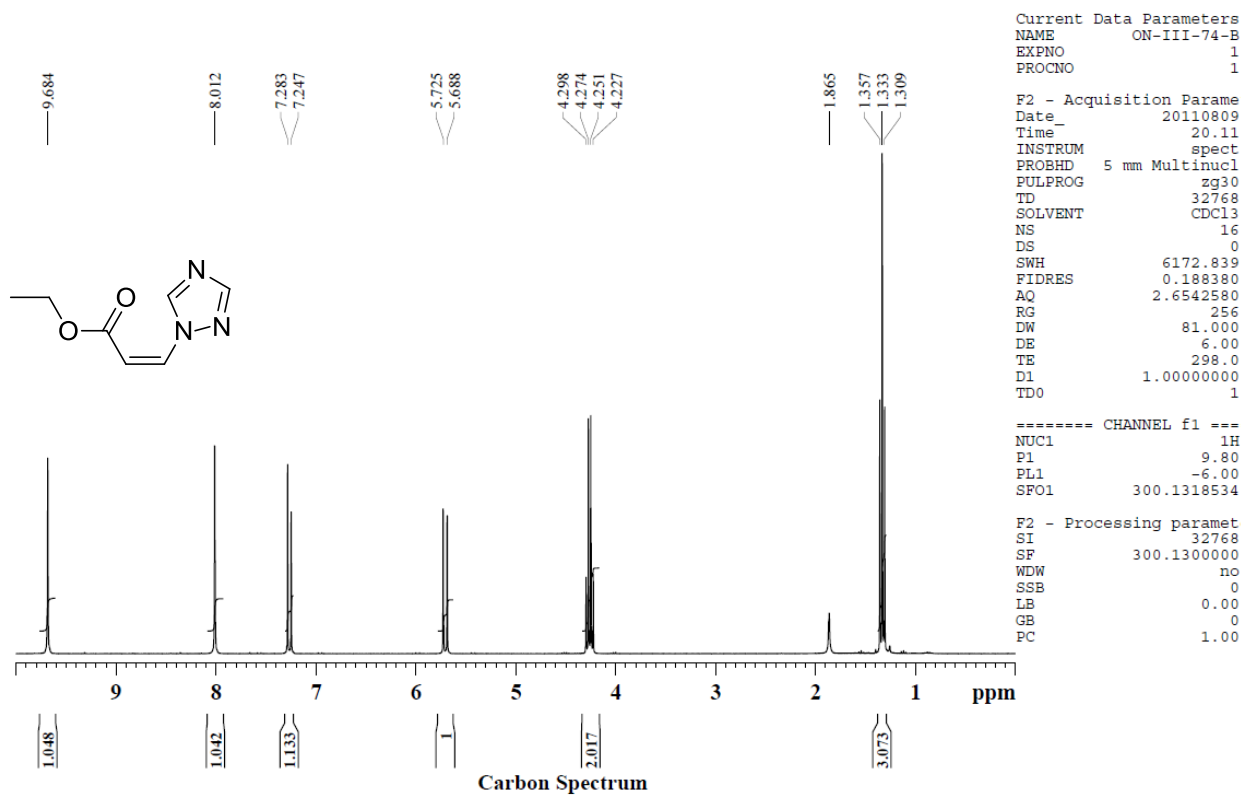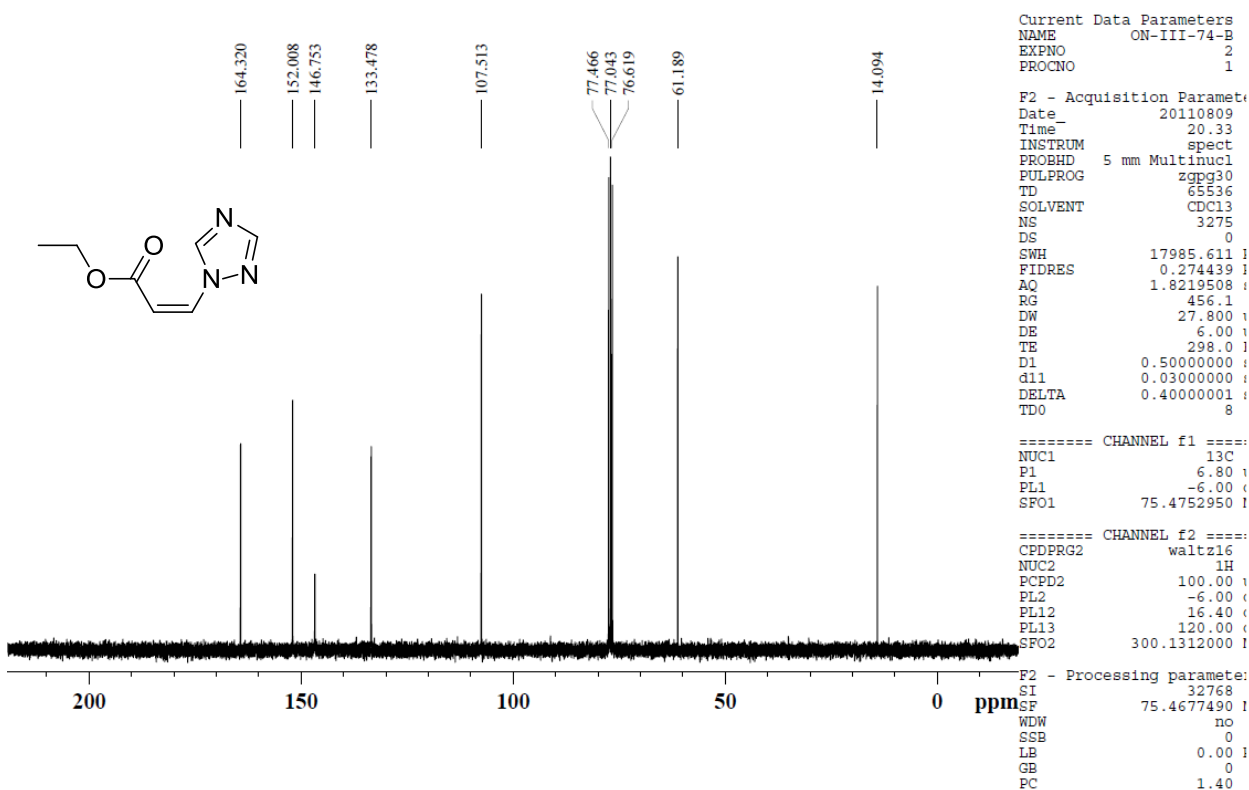

Supplement: NIHMS341202-supplement-1_si_001.pdf [file NIHMS341202-supplement-1_si_001.pdf]
